# Supplementary material for: Synthesis of pyrrolidin-2-ylidenes and pyrrol-2-ylidenes via 1,3-dipolar cycloaddition of H-bond-assisted azomethine ylides to nitrostyrenes
Source: Royal Society of Chemistry journal article supplement (doi:10.1039/d3ob00725a), 2023-01-01
Supplement: d3ob00725a1.pdf [file d3ob00725a1.pdf]

*Supplementary Material*

**A Synthesis of Pyrrolidin-2-ylidenes and Pyrrol-2-ylidenes  
via 1,3-Dipolar Cycloaddition of H-bond-assisted  
Azomethine Ylides to Nitrostyrenes**

**Issa Yavari\*, Ramin Mohsenzadeh, Parisa Ravaghi and Maryam Safaei**

Department of Chemistry, Tarbiat Modares University, PO Box 14115-175, Tehran, Iran

**Supplementary Material- Table of Contents**

|                                                                   |         |
|-------------------------------------------------------------------|---------|
| X-Ray Crystal-Structure Determination of Compound <b>5a</b> ..... | S2-S3   |
| NMR spectra of Compounds <b>5a-5n</b> .....                       | S4-S17  |
| NMR spectra of Compounds <b>10a-10i</b> .....                     | S18-S26 |

## X-Ray Crystal-Structure Determination of 5a

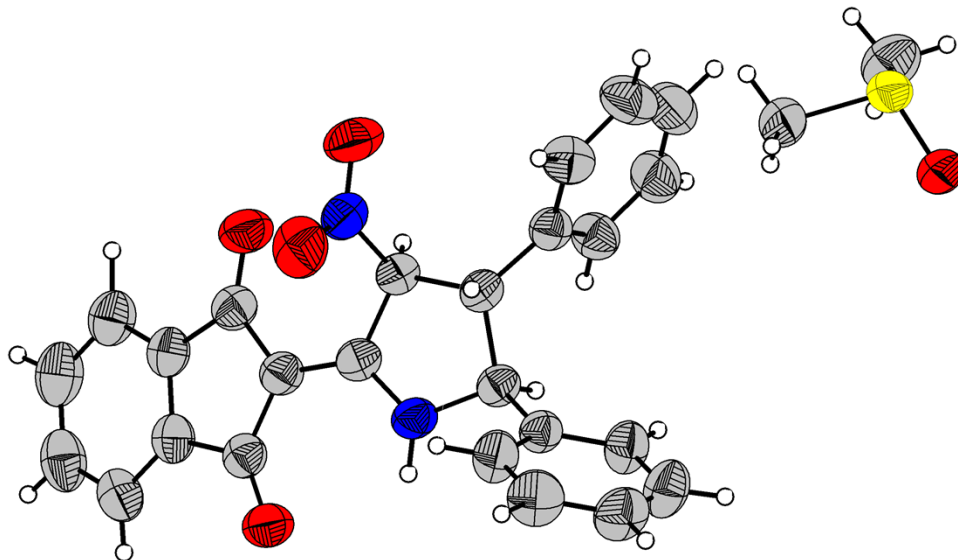

CCDC 2202656 (**5a**) contains the supplementary crystallographic data for this paper. The data can be obtained free of charge from The Cambridge Crystallographic Data Centre via [www.ccdc.cam.ac.uk/getstructures](http://www.ccdc.cam.ac.uk/getstructures).

**Table** Experimental details of Crystal data

|                                    |                                                                                              |
|------------------------------------|----------------------------------------------------------------------------------------------|
| <b>Chemical formula</b>            | <b>C<sub>25</sub>H<sub>18</sub>N<sub>2</sub>O<sub>4</sub> [C<sub>2</sub>H<sub>6</sub>OS]</b> |
| <i>Mr</i>                          | 488.54                                                                                       |
| Crystal system, space group        | Monoclinic, <i>P</i> 2 <sub>1</sub> / <i>n</i>                                               |
| Temperature (K)                    | 290                                                                                          |
| <i>a</i> , <i>b</i> , <i>c</i> (Å) | 14.636 (3), 9.854 (2), 16.905 (3)                                                            |
| $\beta$ (°)                        | 96.34 (3)                                                                                    |
| <i>V</i> (Å <sup>3</sup> )         | 2423.2 (8)                                                                                   |
| <i>Z</i>                           | 4                                                                                            |

|                           |                       |
|---------------------------|-----------------------|
| Radiation type            | Mo $K\alpha$          |
| $\mu$ (mm <sup>-1</sup> ) | 0.18 mm <sup>-1</sup> |
| Crystal size (mm)         | 0.2 × 0.15 × 0.1 mm   |

### ***Data collection***

|                                                                            |                   |
|----------------------------------------------------------------------------|-------------------|
| Diffractometer                                                             | MAR-345dtb        |
| $T_{\min}$ , $T_{\max}$                                                    | 0.790, 1.221      |
| No. of measured, independent and observed [ $I > 2\sigma(I)$ ] reflections | 17051, 4660, 4339 |
| $R_{\text{int}}$                                                           | 0.066             |
| $(\sin \theta/\lambda)_{\text{max}}$ (Å <sup>-1</sup> )                    | 0.616             |

### ***Refinement***

|                                                                            |                                                                        |
|----------------------------------------------------------------------------|------------------------------------------------------------------------|
| $R[F_2 > 2\sigma(F_2)]$ , $wR(F_2)$ , $S$                                  | 0.059, 0.161, 1.16                                                     |
| No. of reflections                                                         | 4660                                                                   |
| No. of parameters                                                          | 390                                                                    |
| No. of restraints                                                          | 1                                                                      |
| H-atom treatment                                                           | H atoms treated by a mixture of independent and constrained refinement |
| $\Delta\rho_{\text{max}}$ , $\Delta\rho_{\text{min}}$ (e Å <sup>-3</sup> ) | 0.26, -0.44                                                            |

Computer programs: MAR345 dtb Program (1.24-4, 2013), Automar software package (3.3a, 2015), *SHELXT* 2018/2 (Sheldrick, 2018), *SHELXL*2016/6 (Sheldrick, 2016), *DIAMOND* (Brandenburg, 1999), *PLATON* (2018).

### **References**

Dolomanov, O. V., Bourhis, L. J., Gildea, R. J., Howard, J. A. K. & Puschmann, H. (2009). *J. Appl. Cryst.* **42**, 339-341.  
Sheldrick, G. M. (2015). *Acta Cryst. C* **71**, 3-8.

# NMR spectra of 2-(3-nitro-4,5-diarylprrolidin-2-ylidene)-1*H*-indene-1,3(2*H*)-diones **5a-5n**

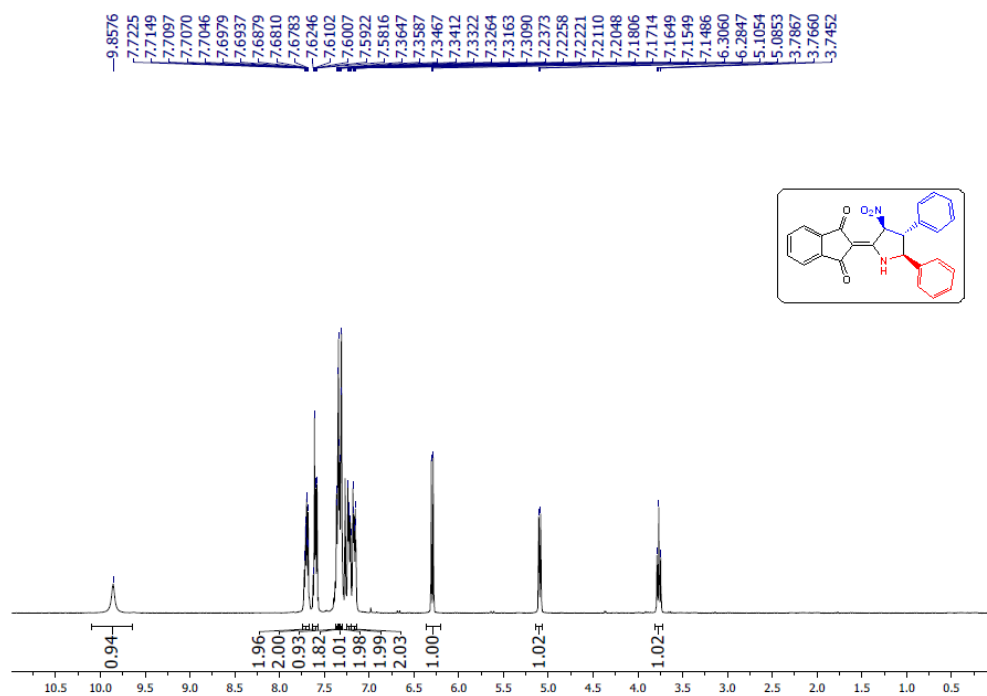

<sup>1</sup>H NMR (300 MHz) of Compound **5a** in CDCl<sub>3</sub>

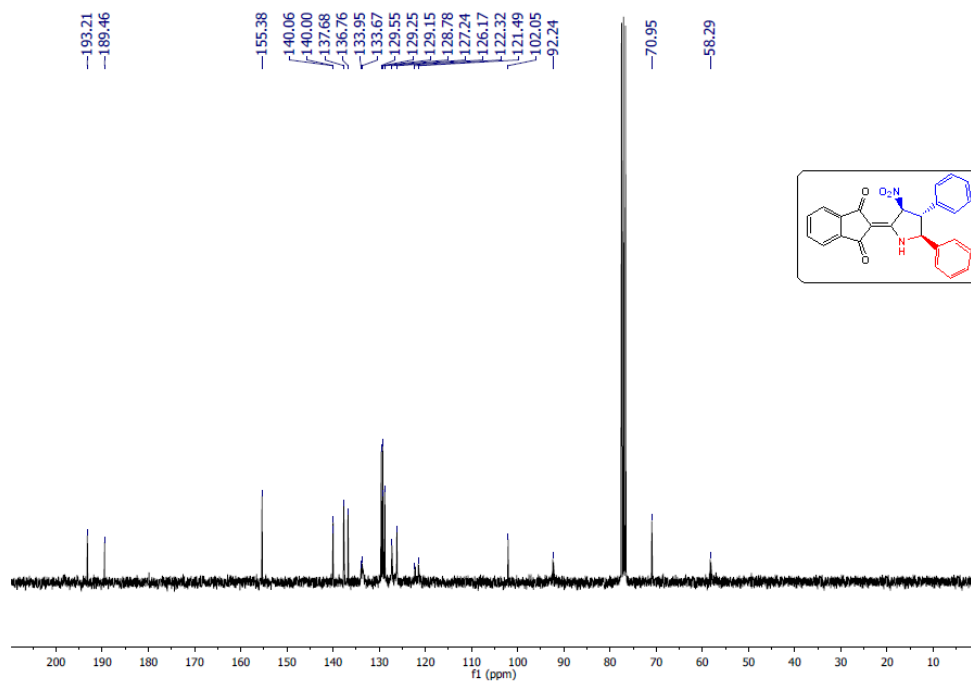

<sup>13</sup>C NMR (75.6 MHz) of Compound **5a** in CDCl<sub>3</sub>

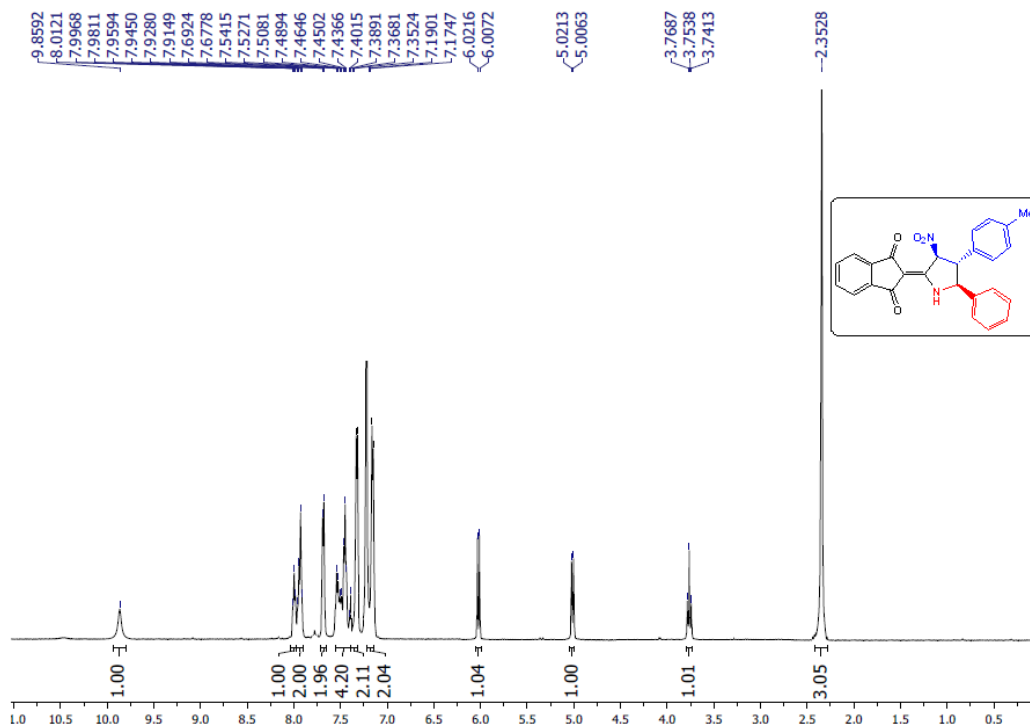

**<sup>1</sup>H NMR (500 MHz) of Compound **5b** in CDCl<sub>3</sub>**

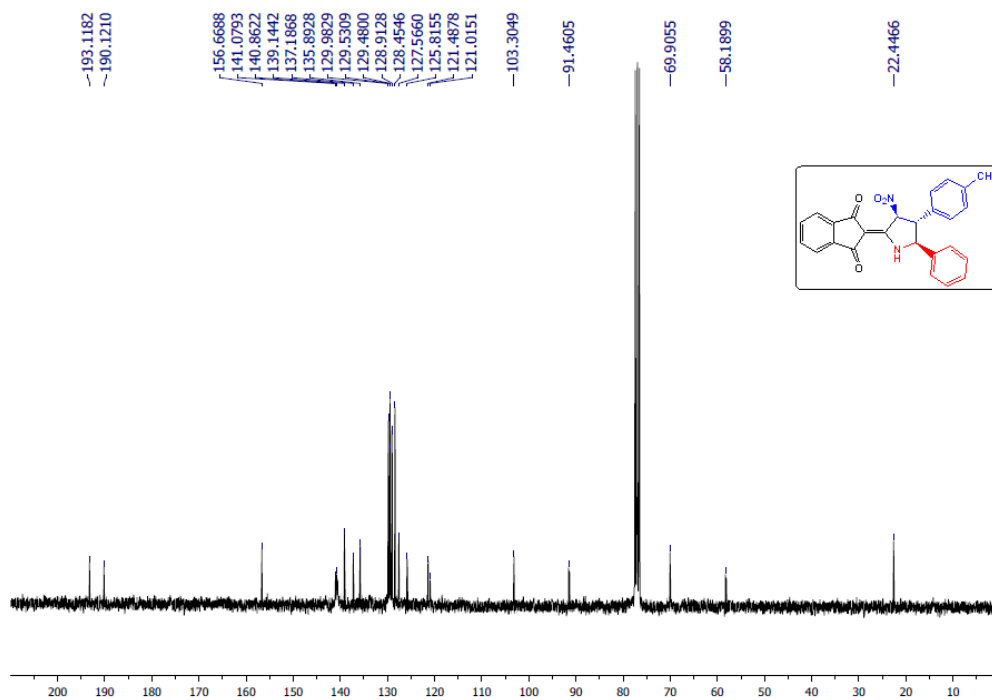

**<sup>13</sup>C NMR (126 MHz) of Compound **5b** in CDCl<sub>3</sub>**

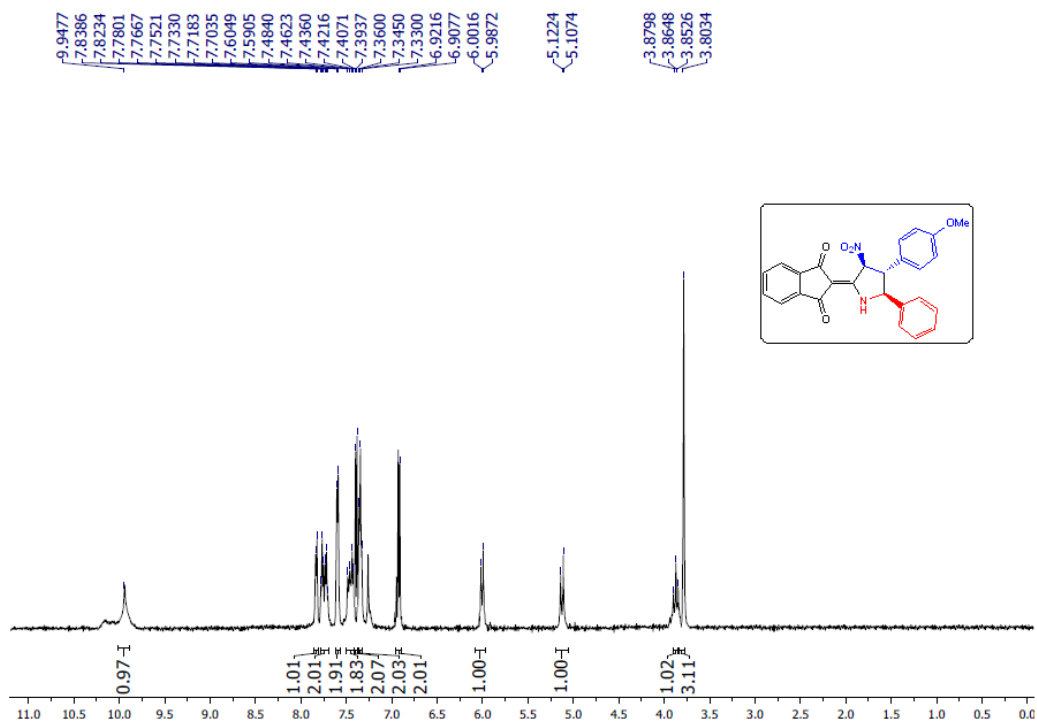

$^1\text{H}$  NMR (500 MHz) of Compound **5c** in  $\text{CDCl}_3$

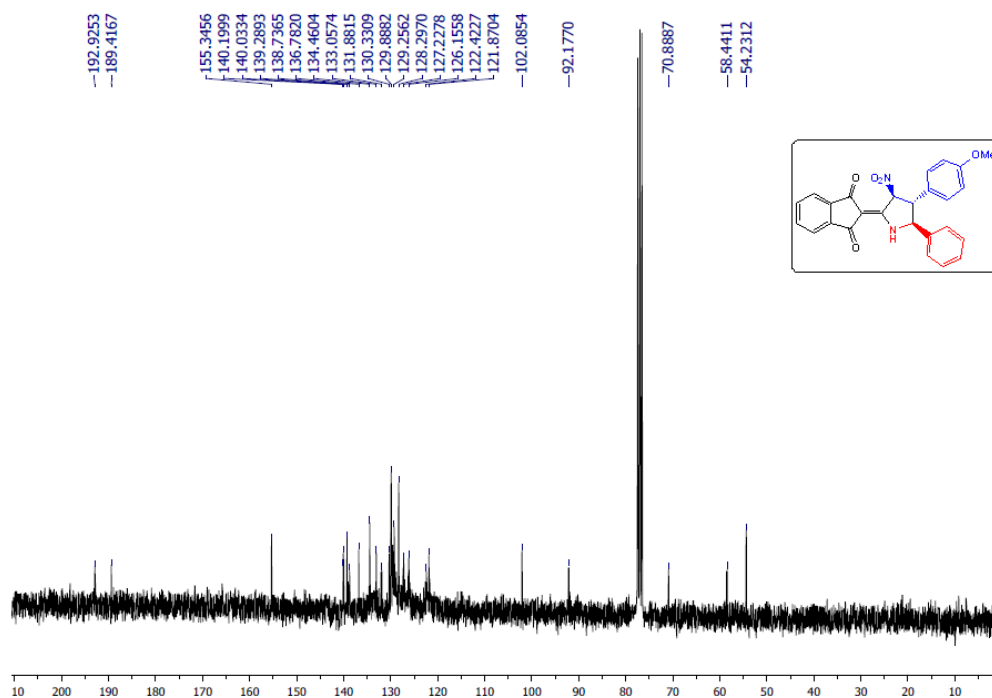

$^{13}\text{C}$  NMR (126 MHz) of Compound **5c** in  $\text{CDCl}_3$

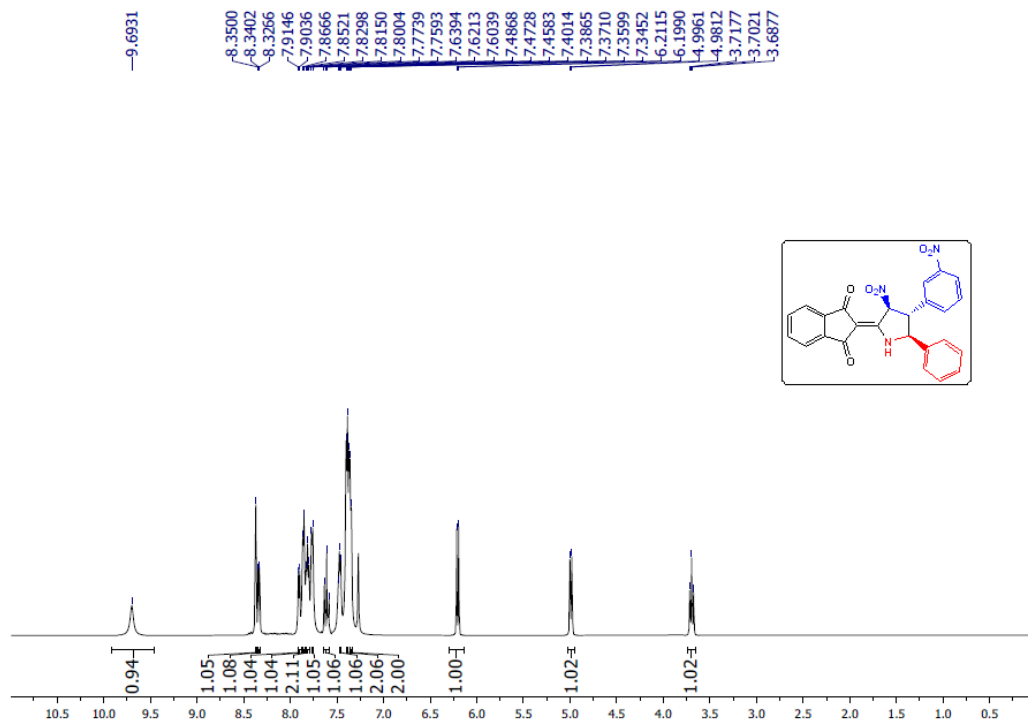

<sup>1</sup>H NMR (500 MHz) of Compound **5d** in CDCl<sub>3</sub>

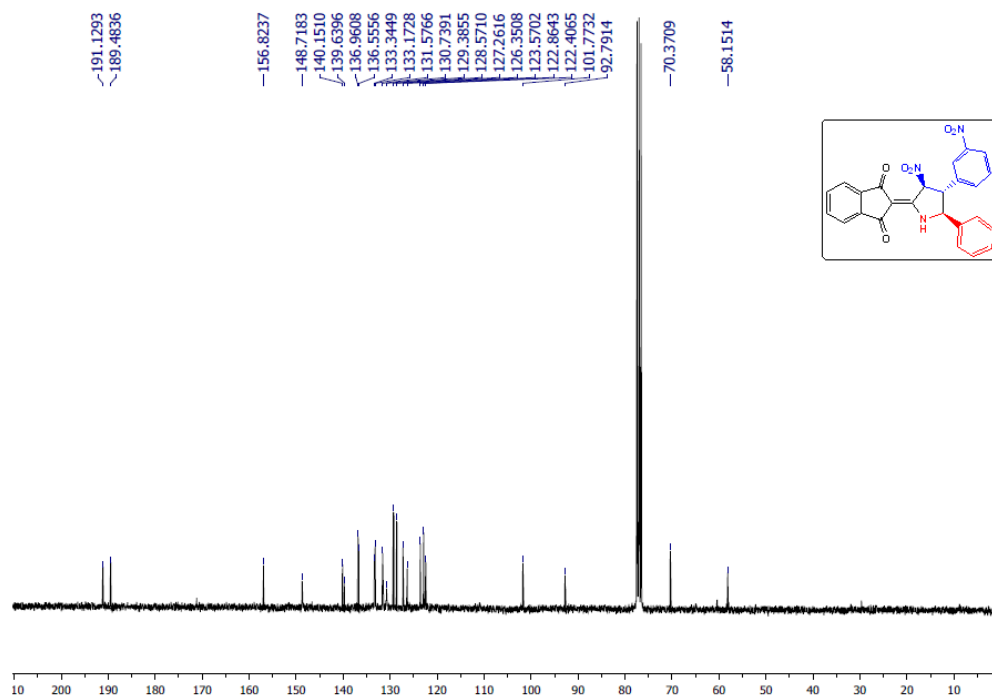

<sup>13</sup>C NMR (126 MHz) of Compound **5d** in CDCl<sub>3</sub>

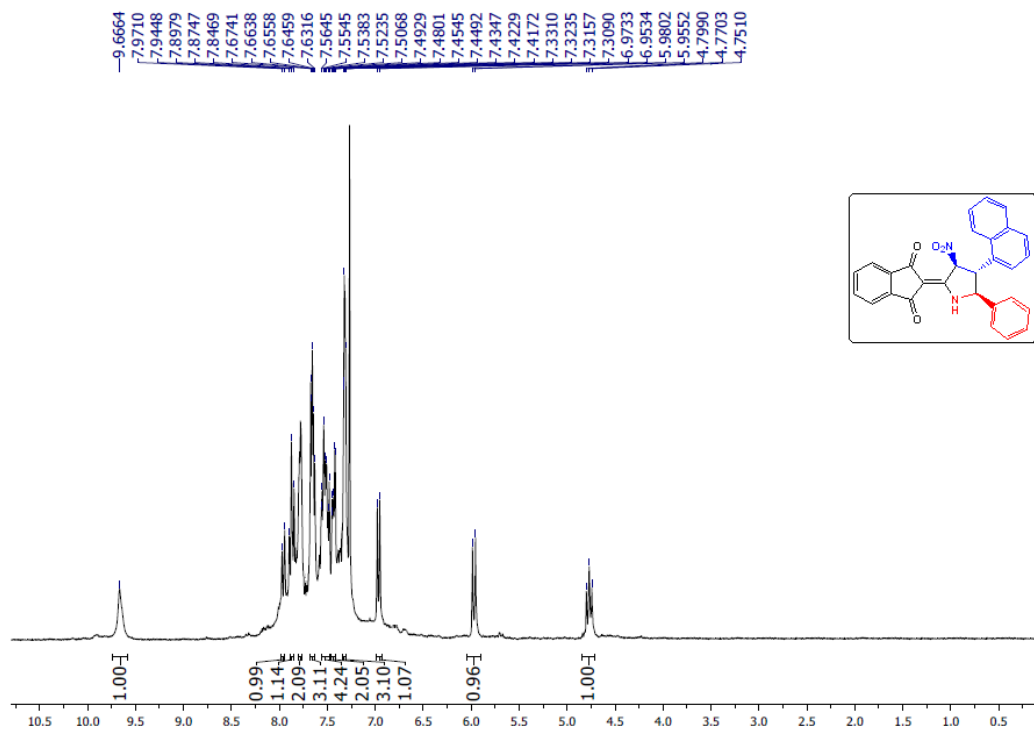

$^1\text{H}$  NMR (500 MHz) of compound **5e** in  $\text{CDCl}_3$

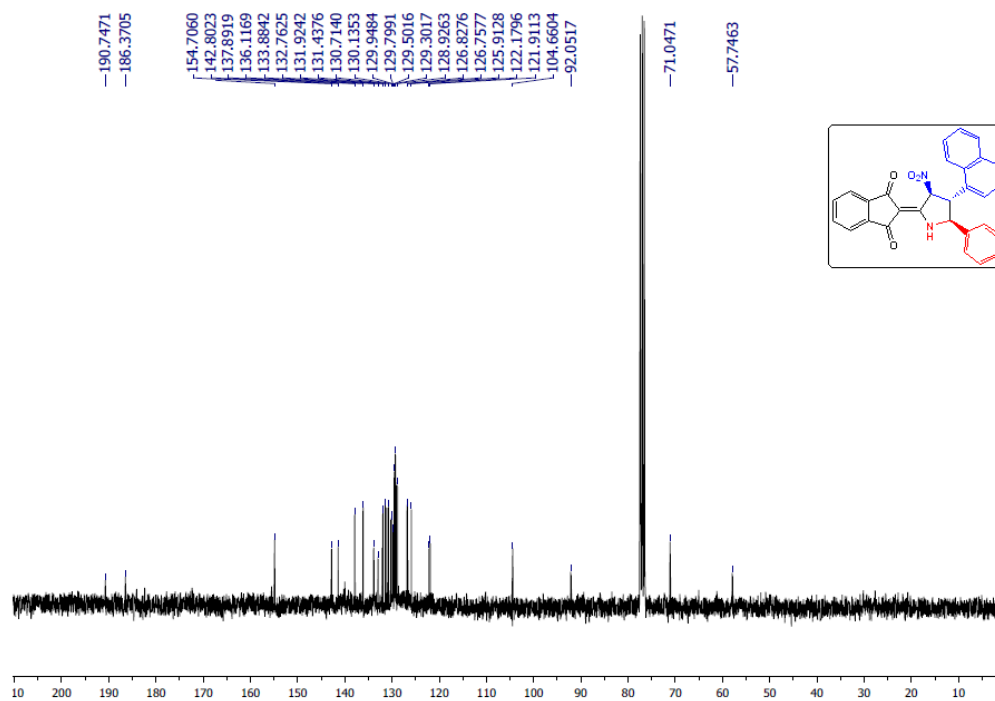

$^{13}\text{C}$  NMR (126 MHz) of compound **5e** in  $\text{CDCl}_3$



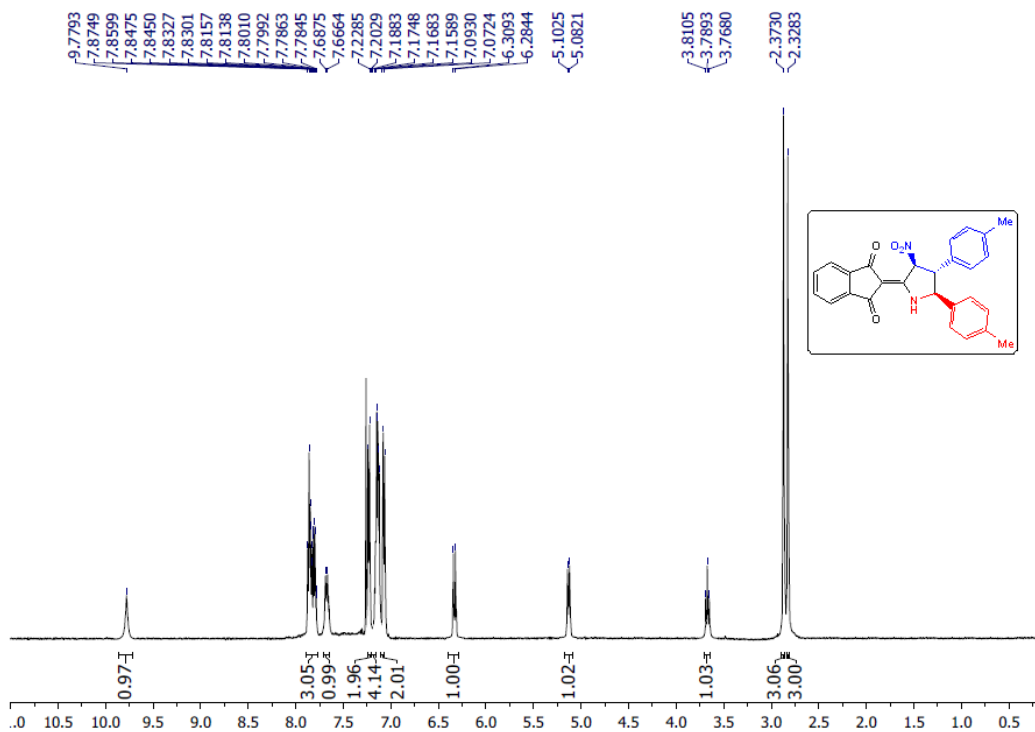

$^1\text{H}$  NMR (300 MHz) of compound **5f** in  $\text{CDCl}_3$

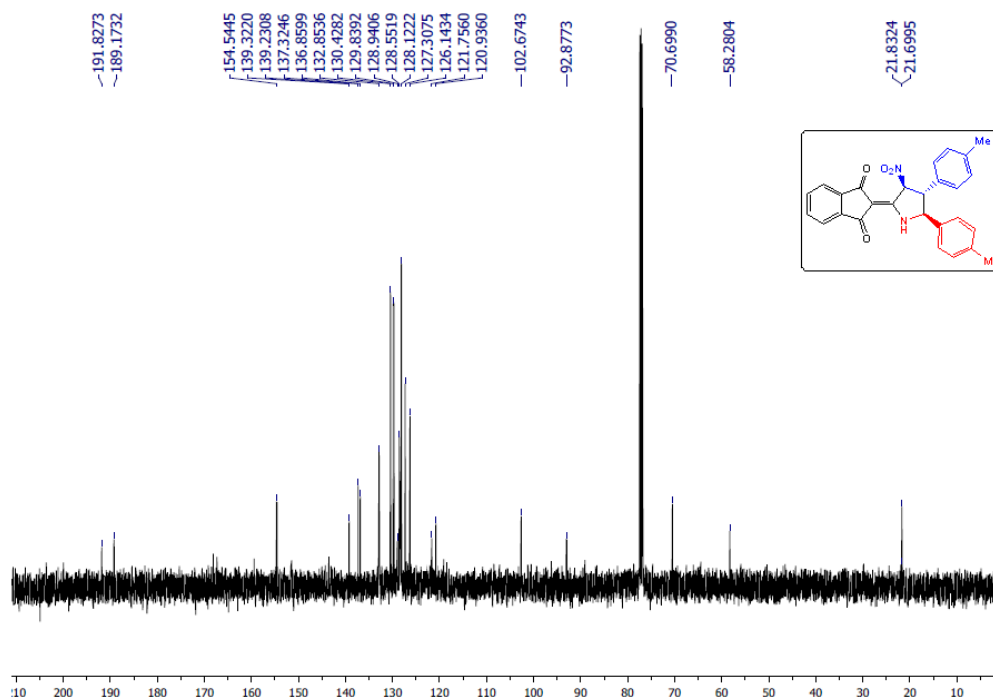

$^{13}\text{C}$  NMR (75.6 MHz) of compound **5f** in  $\text{CDCl}_3$

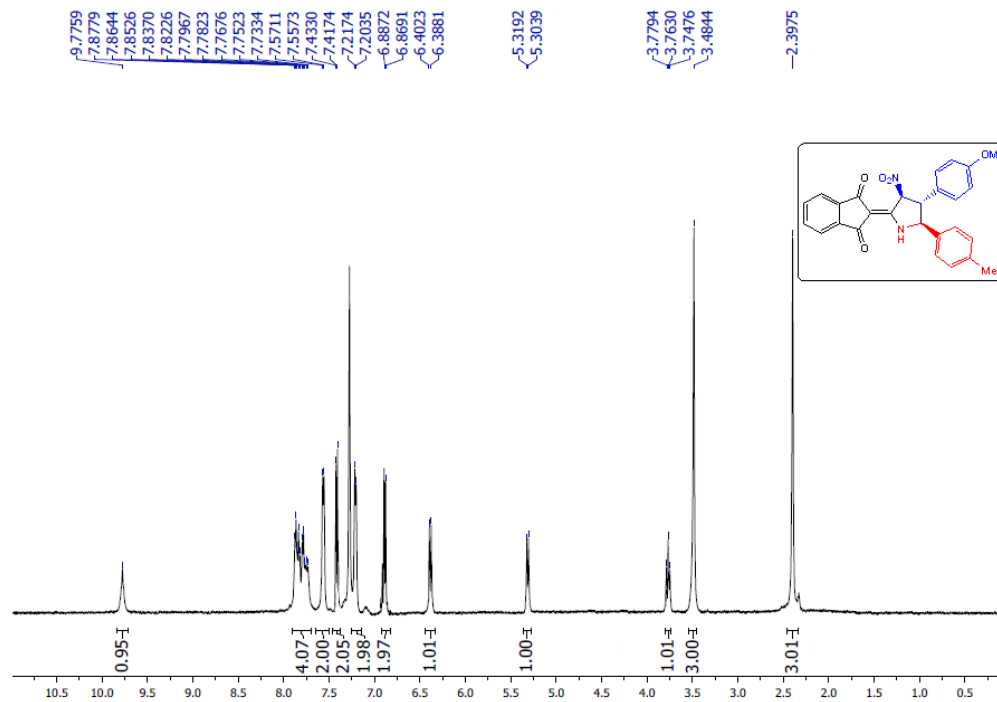

$^1\text{H}$  NMR (500 MHz) of compound **5g** in  $\text{CDCl}_3$

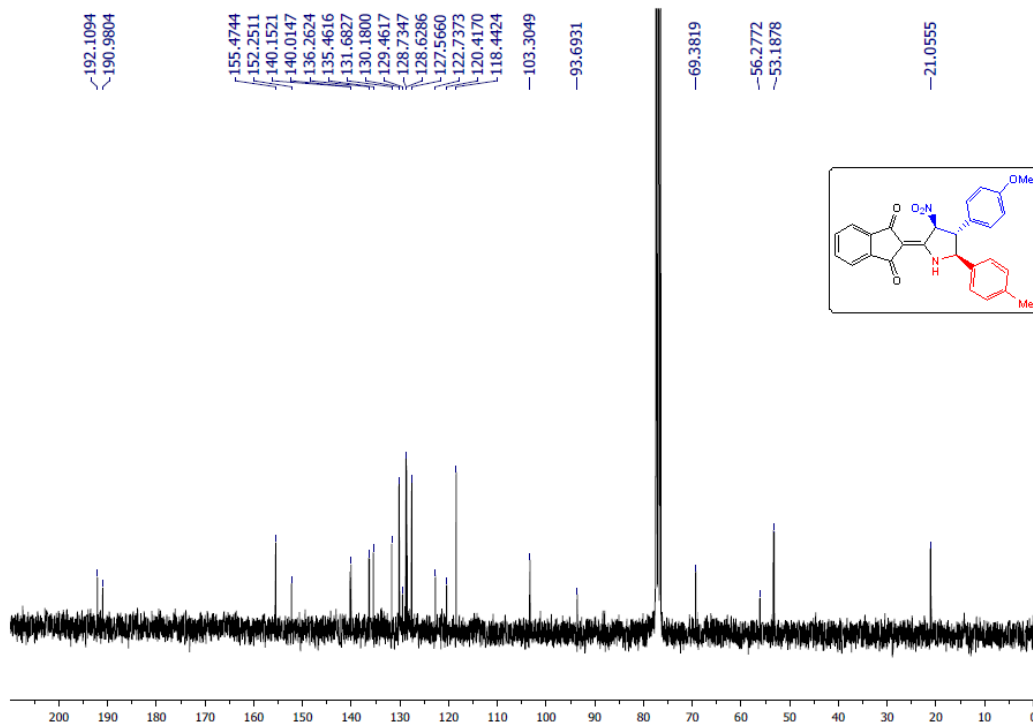

$^{13}\text{C}$  NMR (126 MHz) of compound **5g** in  $\text{CDCl}_3$

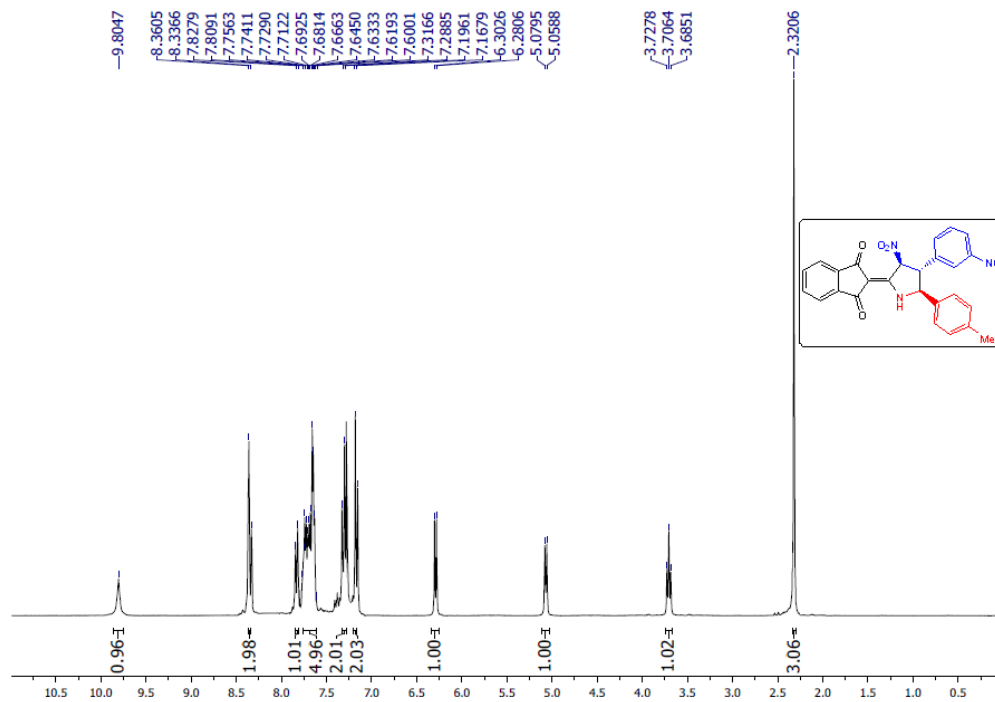

$^1\text{H}$  NMR (300 MHz) of compound **5h** in  $\text{CDCl}_3$

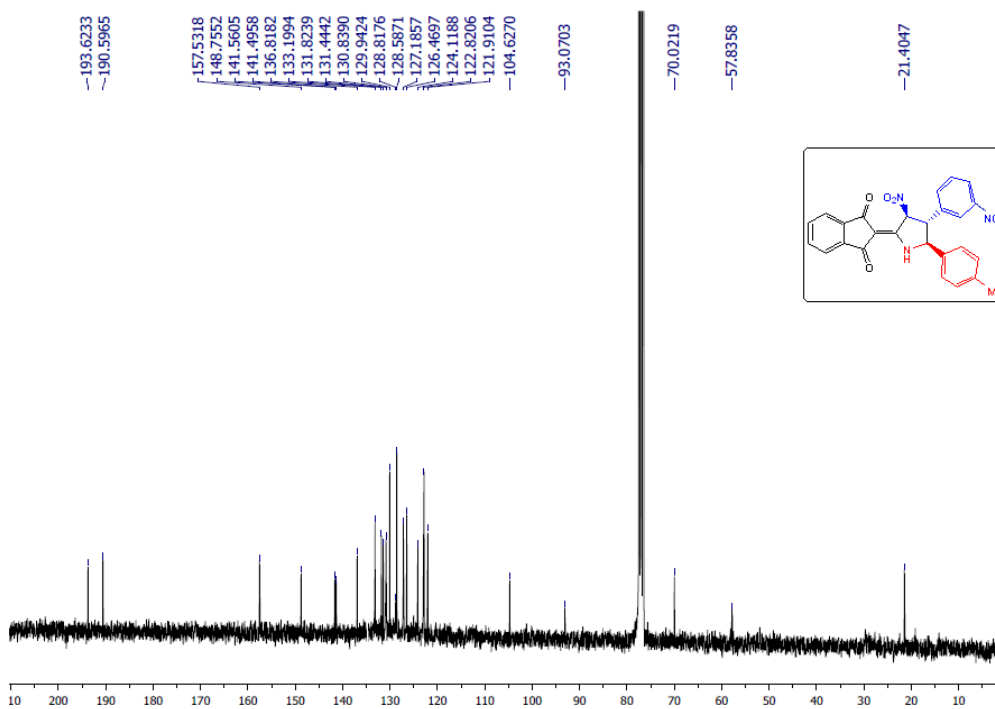

$^{13}\text{C}$  NMR (75.6 MHz) of compound **5h** in  $\text{CDCl}_3$

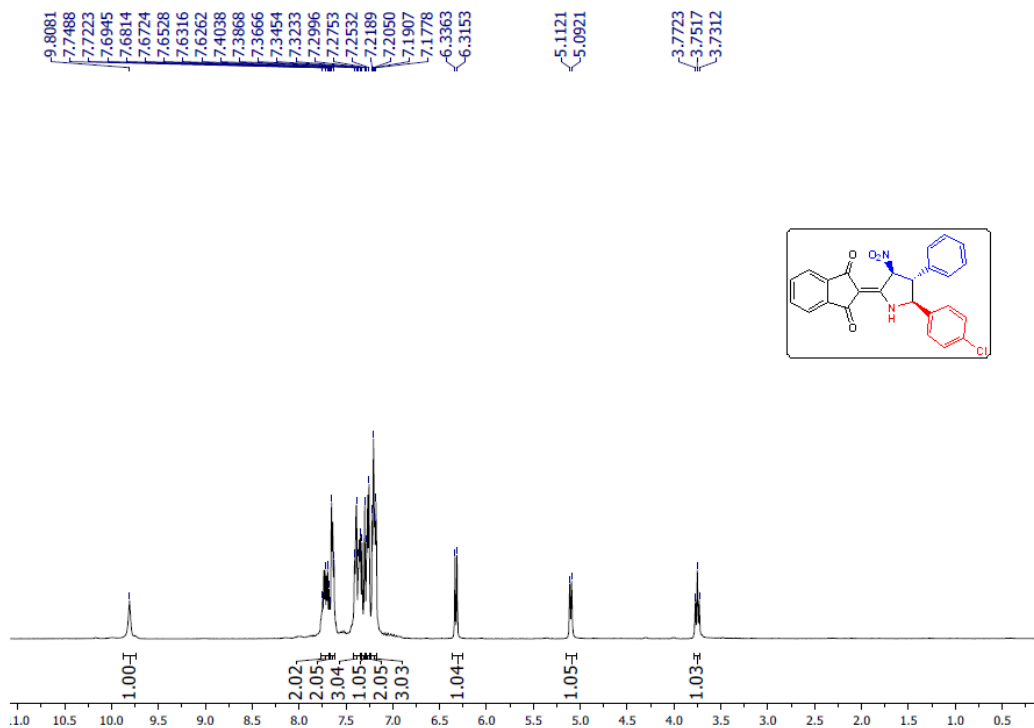

<sup>1</sup>H NMR (300 MHz) of compound **5i** in CDCl<sub>3</sub>

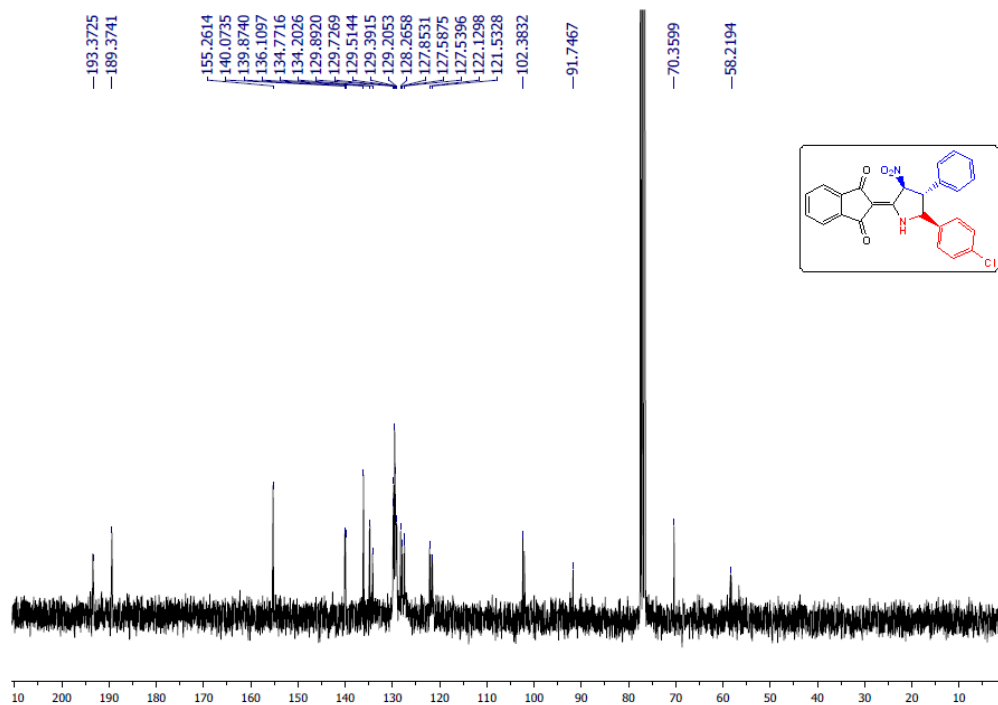

<sup>13</sup>C NMR (75.6 MHz) of compound **5i** in CDCl<sub>3</sub>

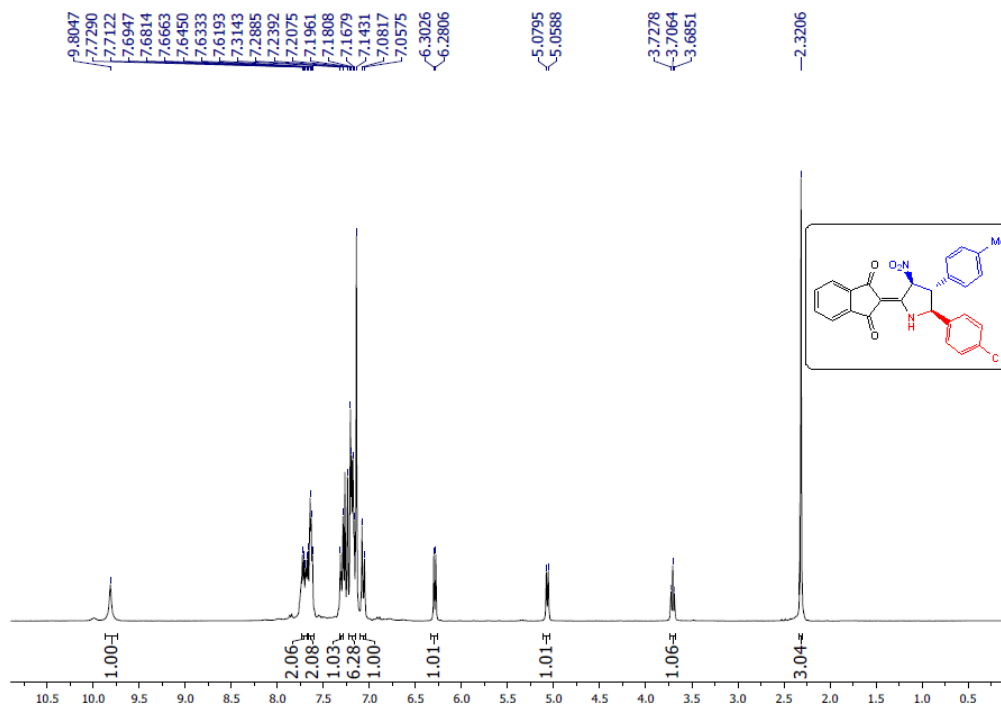

$^1\text{H}$  NMR (300 MHz) of compound **5j** in  $\text{CDCl}_3$

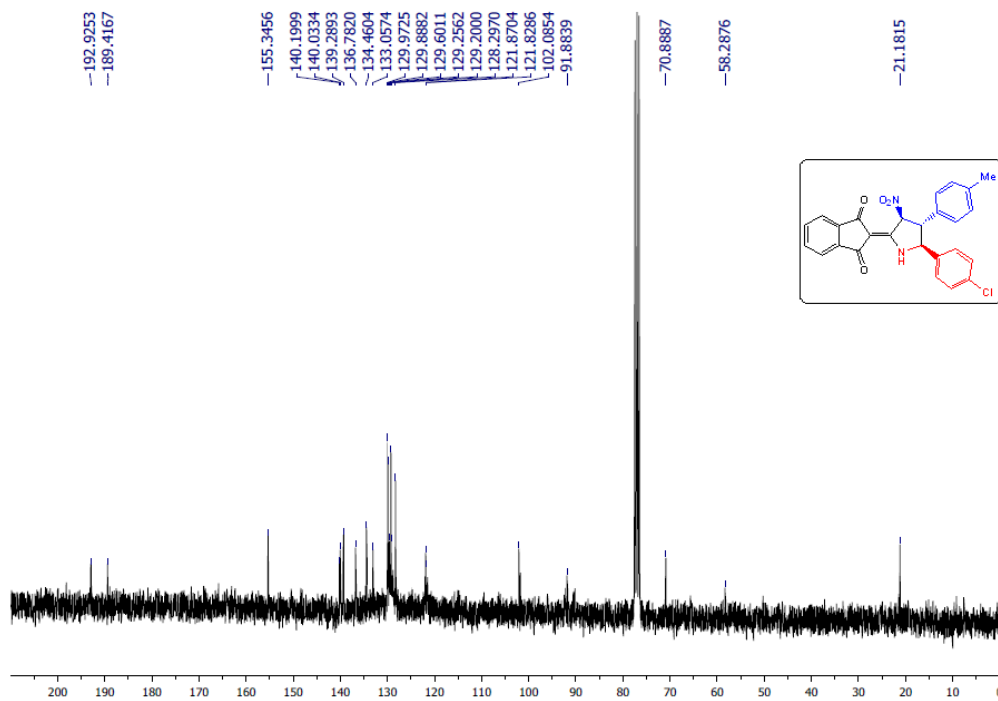

$^{13}\text{C}$  NMR (75.6 MHz) of compound **5j** in  $\text{CDCl}_3$

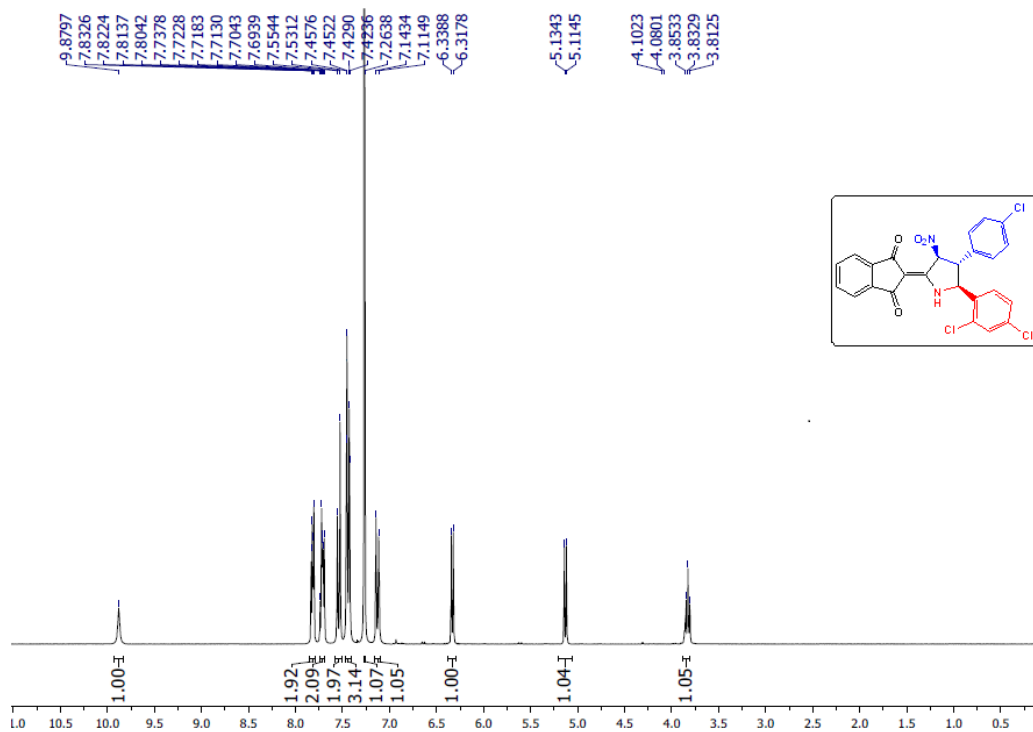

<sup>1</sup>H NMR (300 MHz) of compound **5k** in CDCl<sub>3</sub>

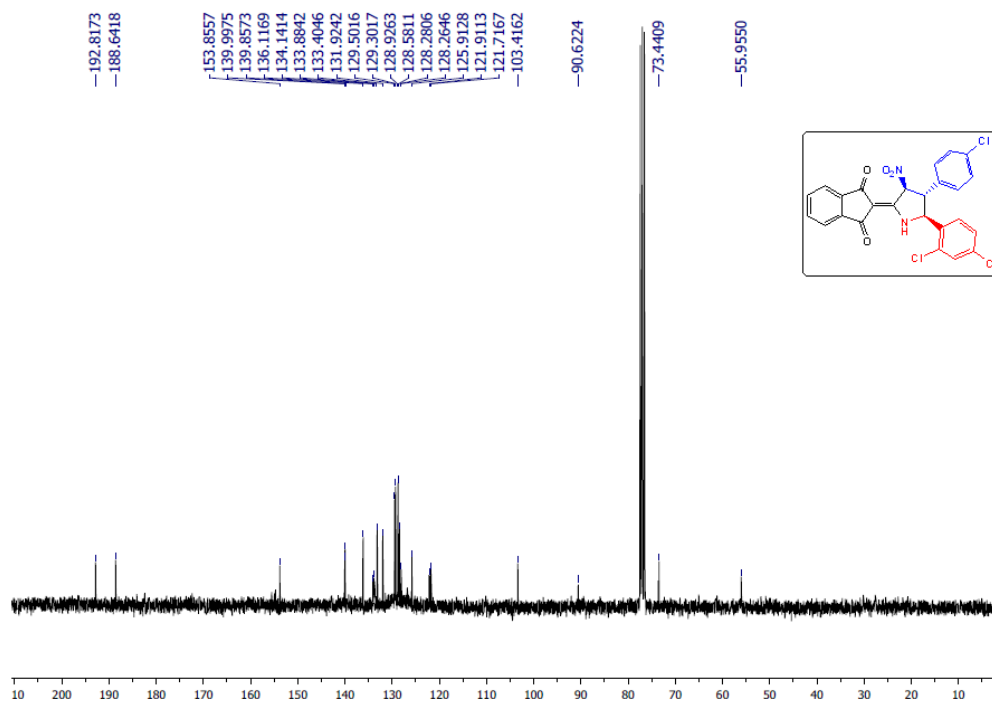

<sup>13</sup>C NMR (75.6 MHz) of compound **5k** in CDCl<sub>3</sub>

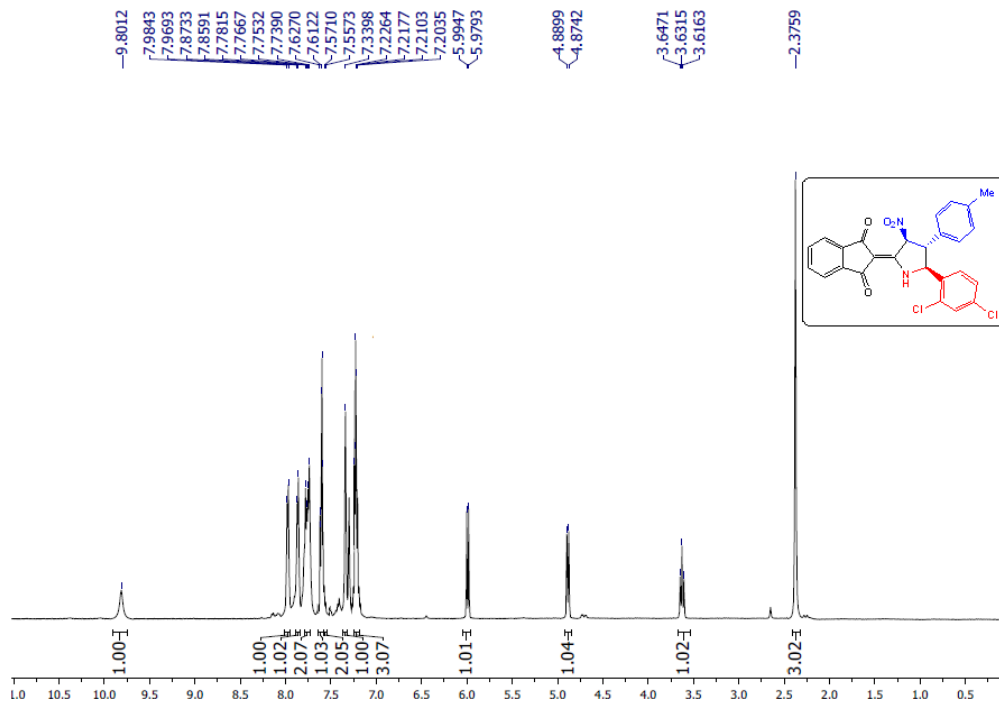

<sup>1</sup>H NMR (500 MHz) of compound **5I** in CDCl<sub>3</sub>

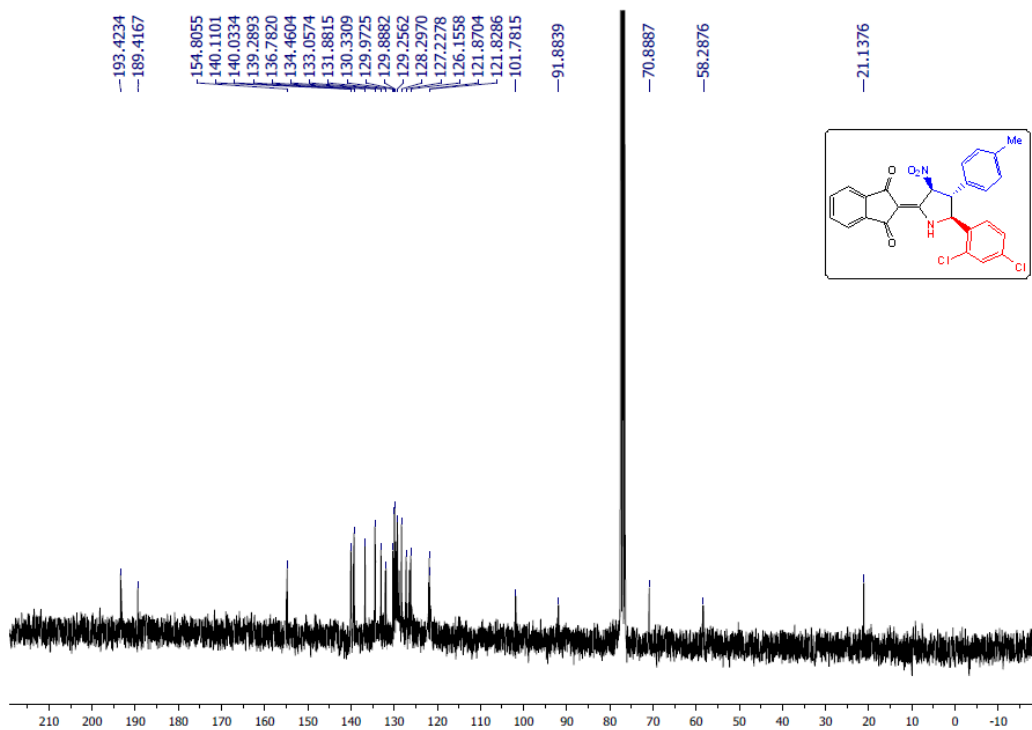

<sup>13</sup>C NMR (126 MHz) of compound **5I** in CDCl<sub>3</sub>

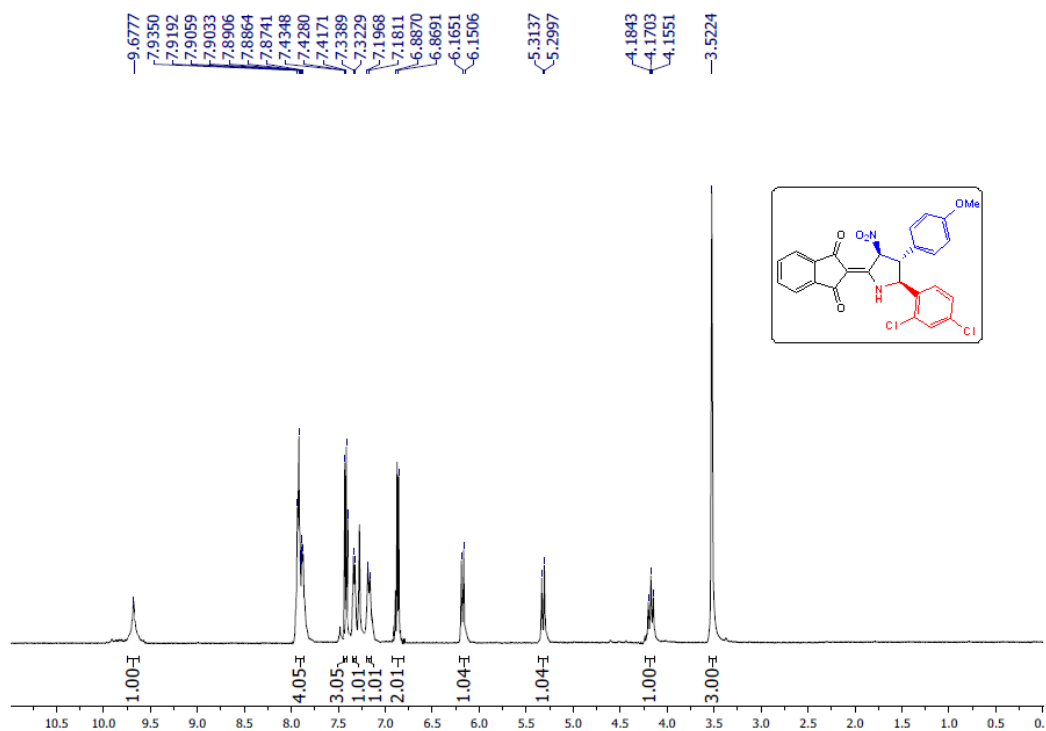

$^1\text{H}$  NMR (500 MHz) of compound **5m** in  $\text{CDCl}_3$

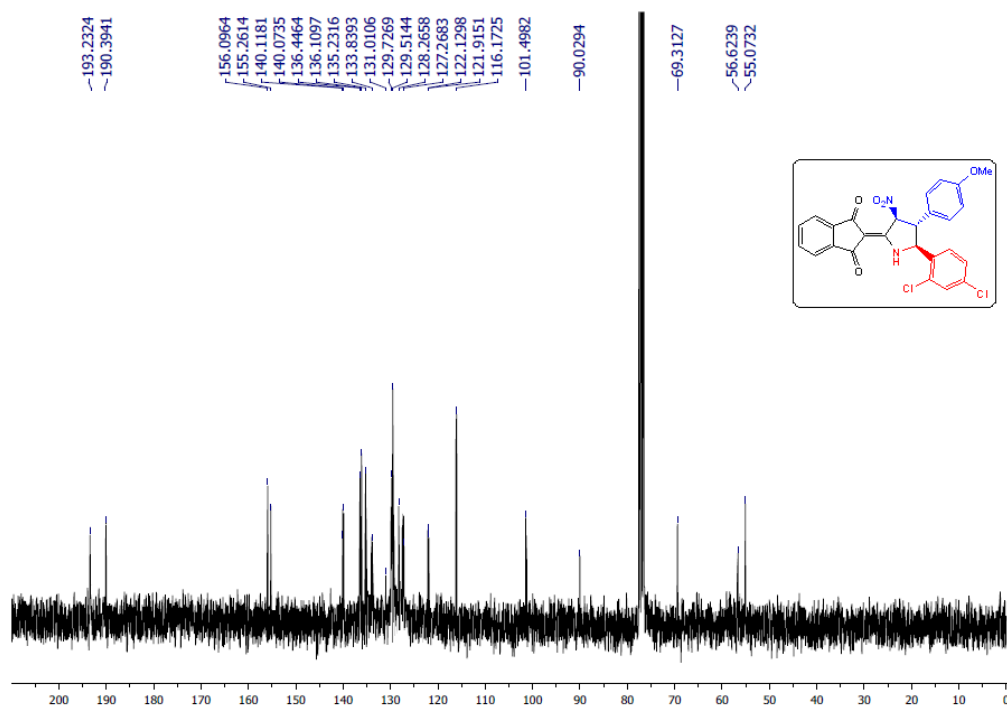

$^{13}\text{C}$  NMR (126 MHz) of compound **5m** in  $\text{CDCl}_3$



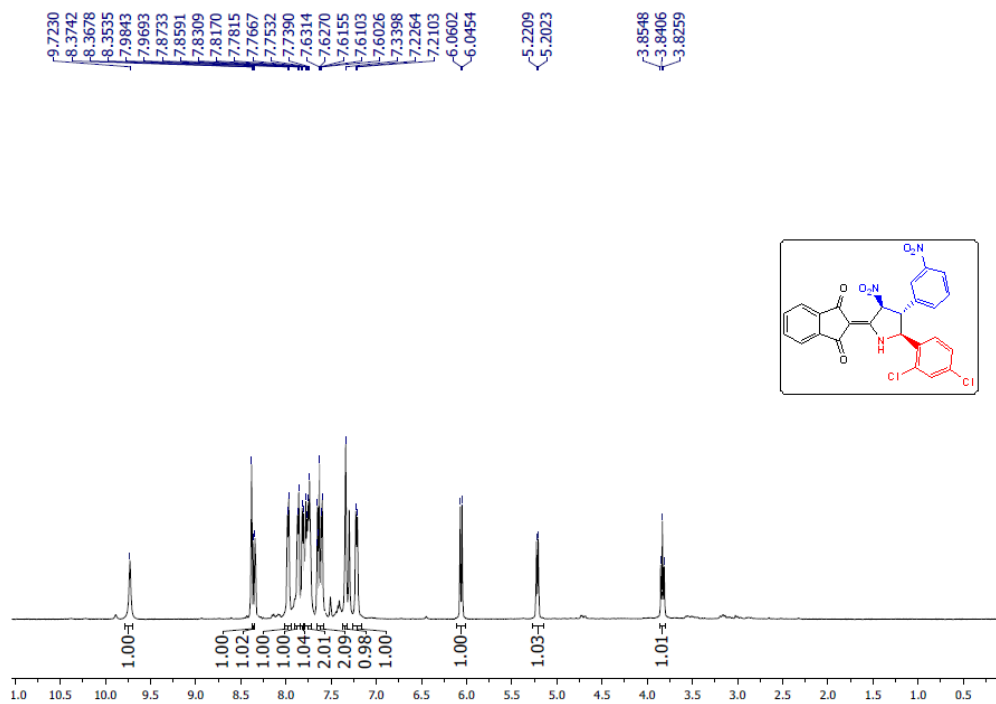

<sup>1</sup>H NMR (500 MHz) of compound **5n** in CDCl<sub>3</sub>

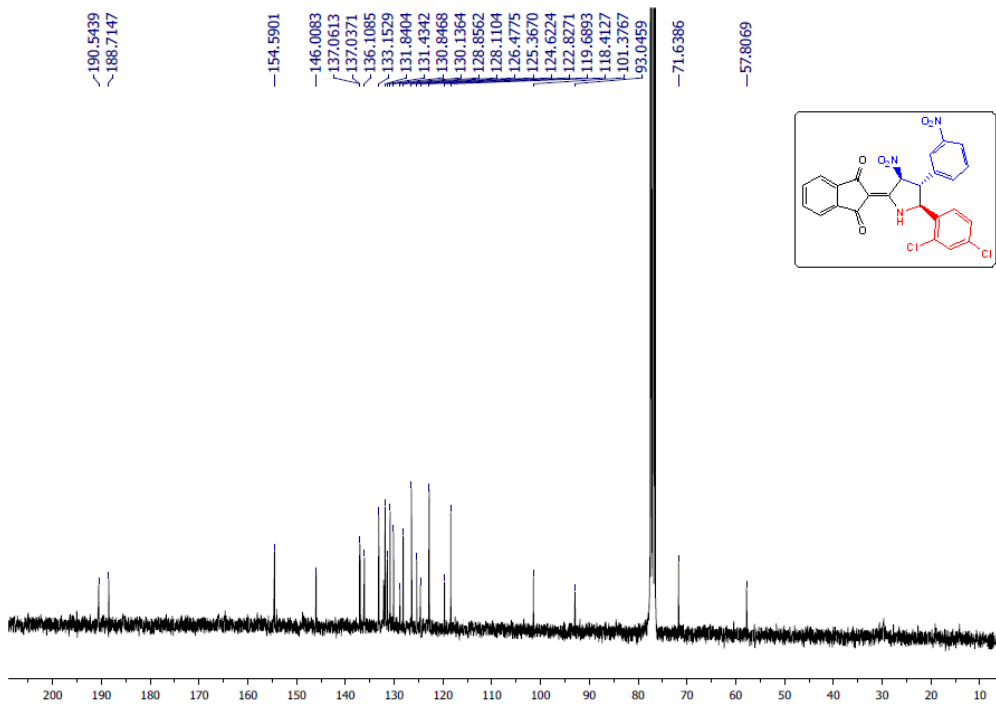

<sup>13</sup>C NMR (126 MHz) of compound **5n** in CDCl<sub>3</sub>

NMR spectra of 2-(4,5-diaryl-1,5-dihydro-2H-pyrrol-2-ylidene)-1H-indene-1,3(2H)-diones  
10a-10i

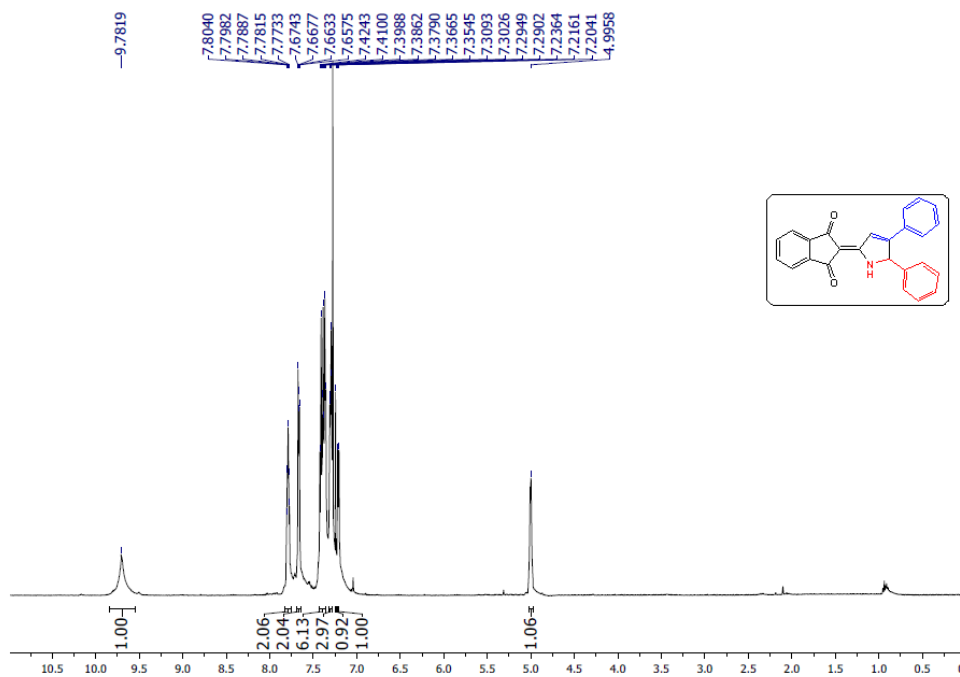

<sup>1</sup>H NMR (500 MHz) of compound 10a in CDCl<sub>3</sub>

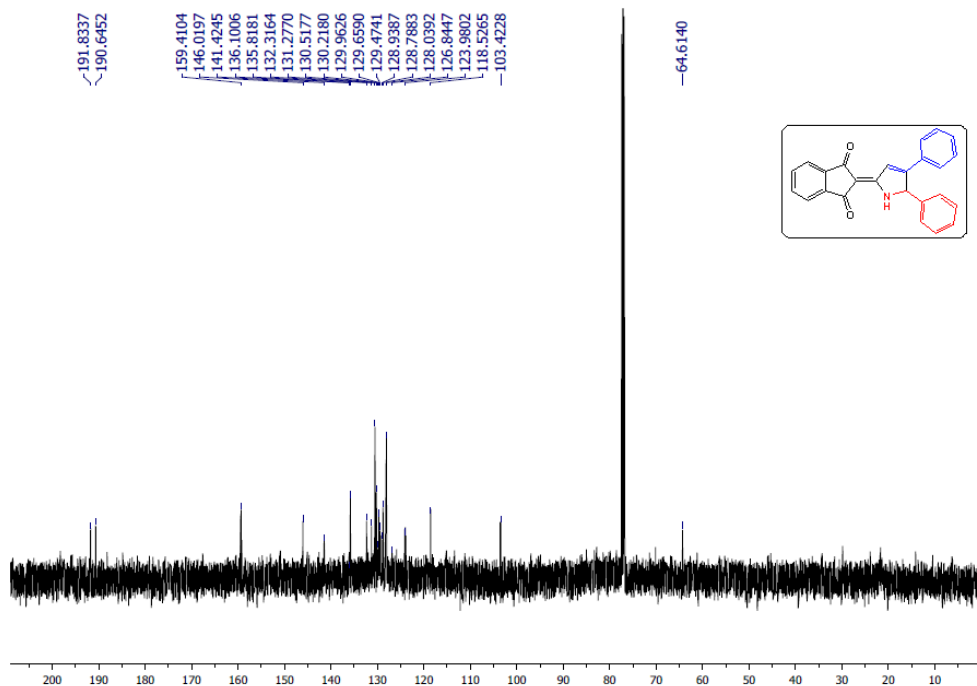

<sup>13</sup>C NMR (126 MHz) of compound 10a in CDCl<sub>3</sub>

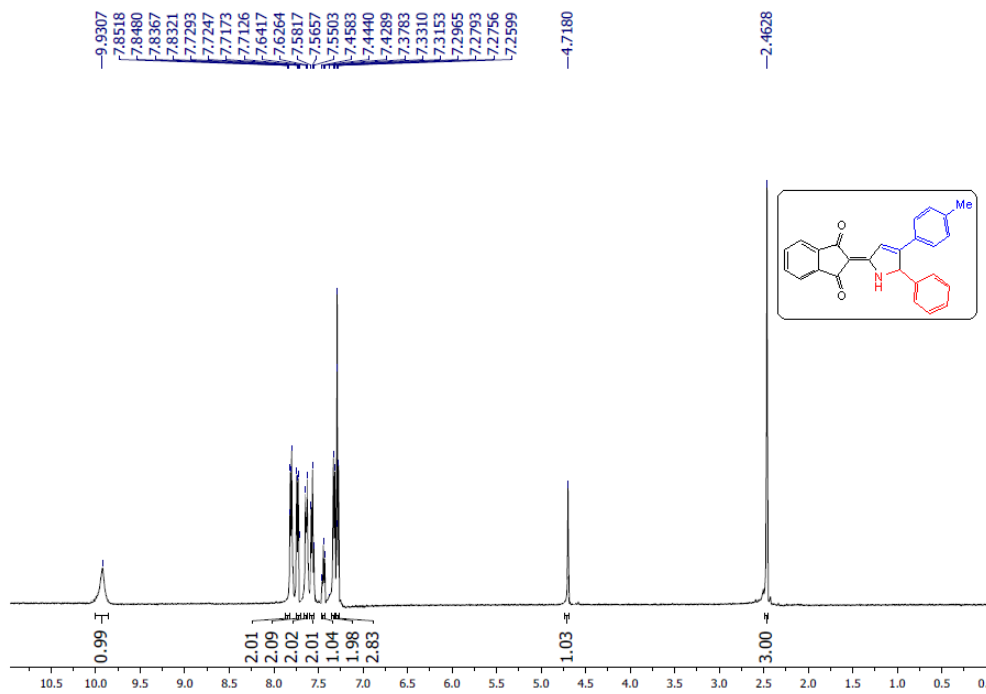

$^1\text{H}$  NMR (500 MHz) of compound **10b** in  $\text{CDCl}_3$

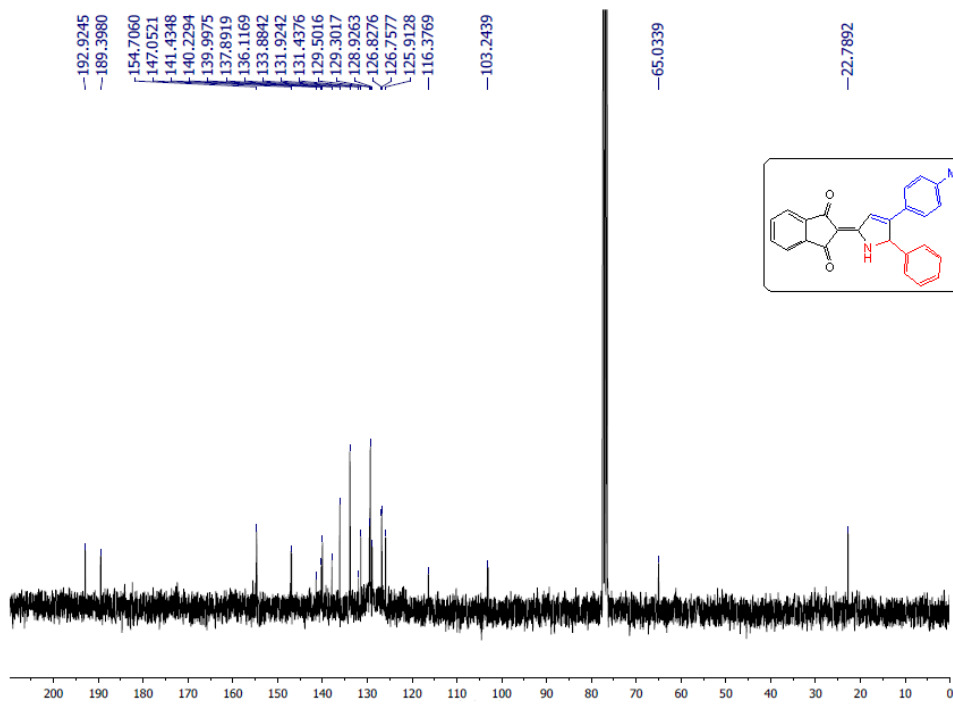

$^{13}\text{C}$  NMR (126 MHz) of compound **10b** in  $\text{CDCl}_3$

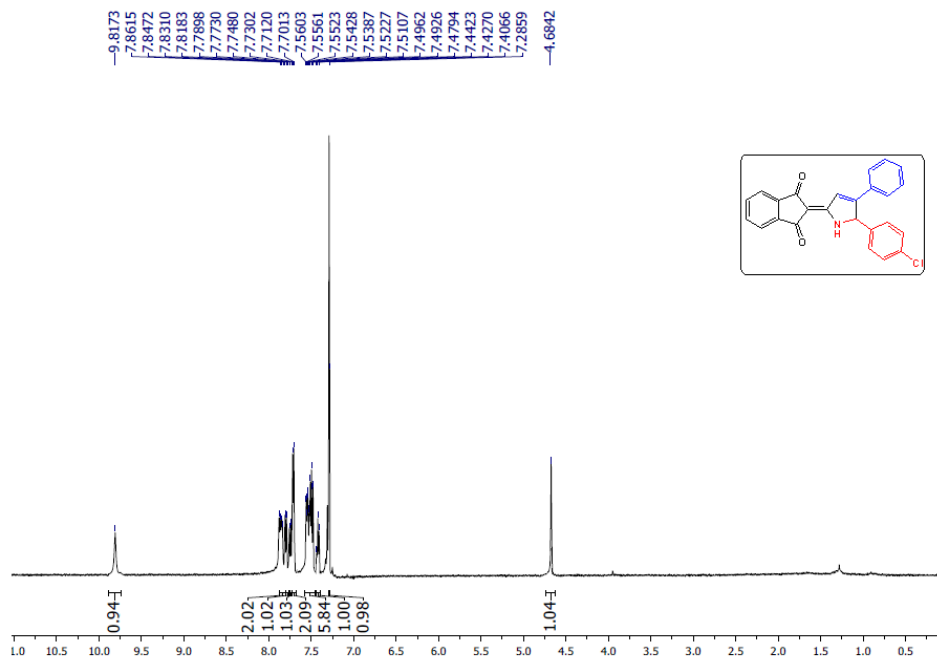

$^1\text{H}$  NMR (500 MHz) of compound **10c** in  $\text{CDCl}_3$

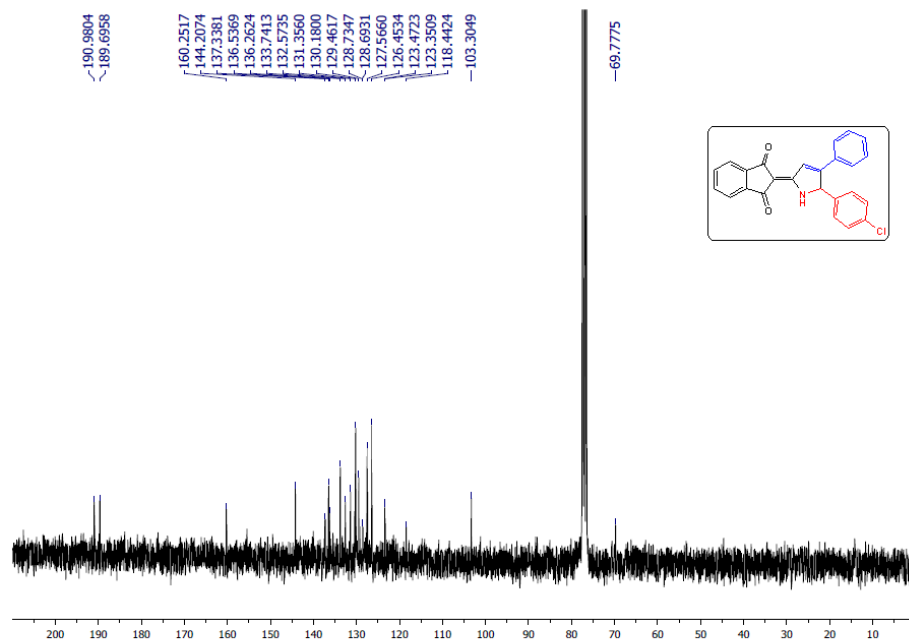

$^{13}\text{C}$  NMR (126 MHz) of compound **10c** in  $\text{CDCl}_3$

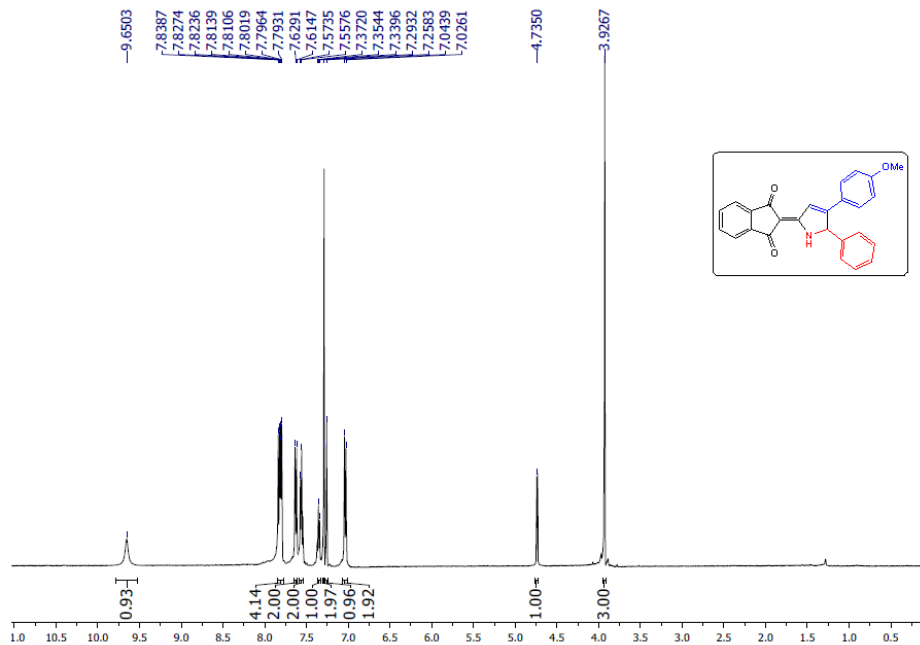

$^1\text{H}$  NMR (500 MHz) of compound **10d** in  $\text{CDCl}_3$

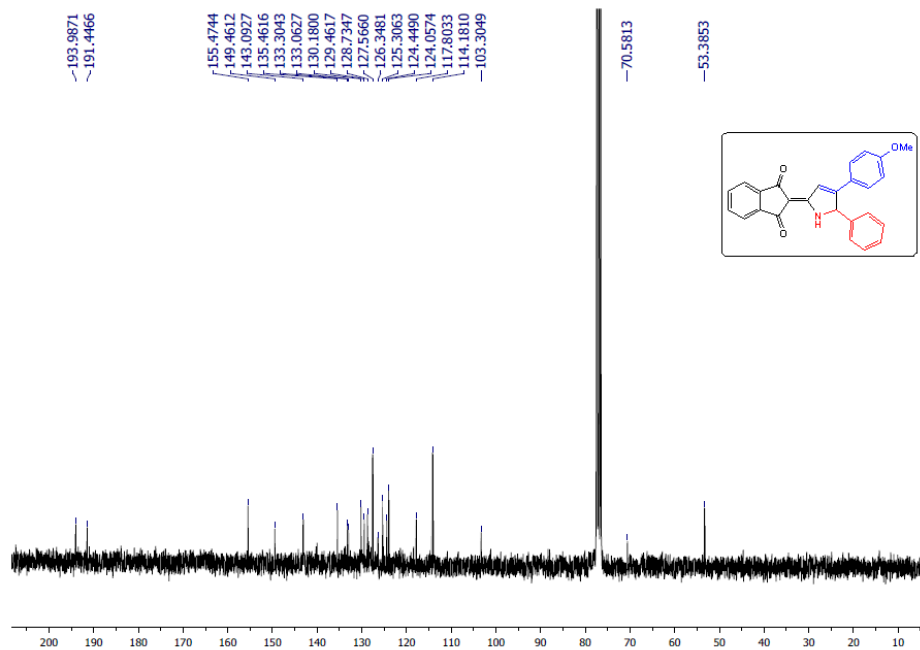

$^{13}\text{C}$  NMR (126 MHz) of compound **10d** in  $\text{CDCl}_3$

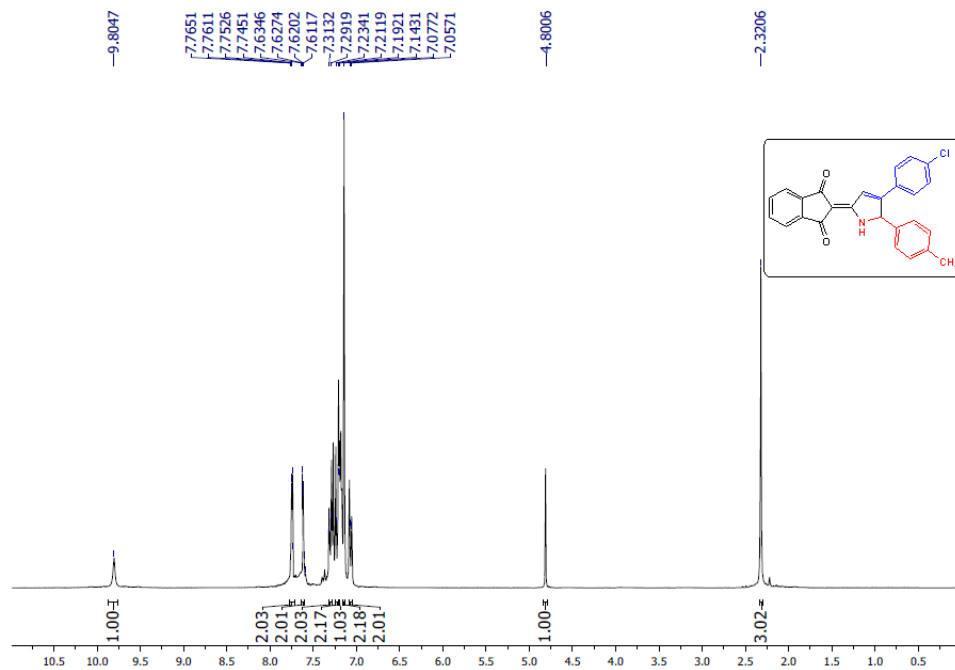

$^1\text{H}$  NMR (500 MHz) of compound **10e** in  $\text{CDCl}_3$

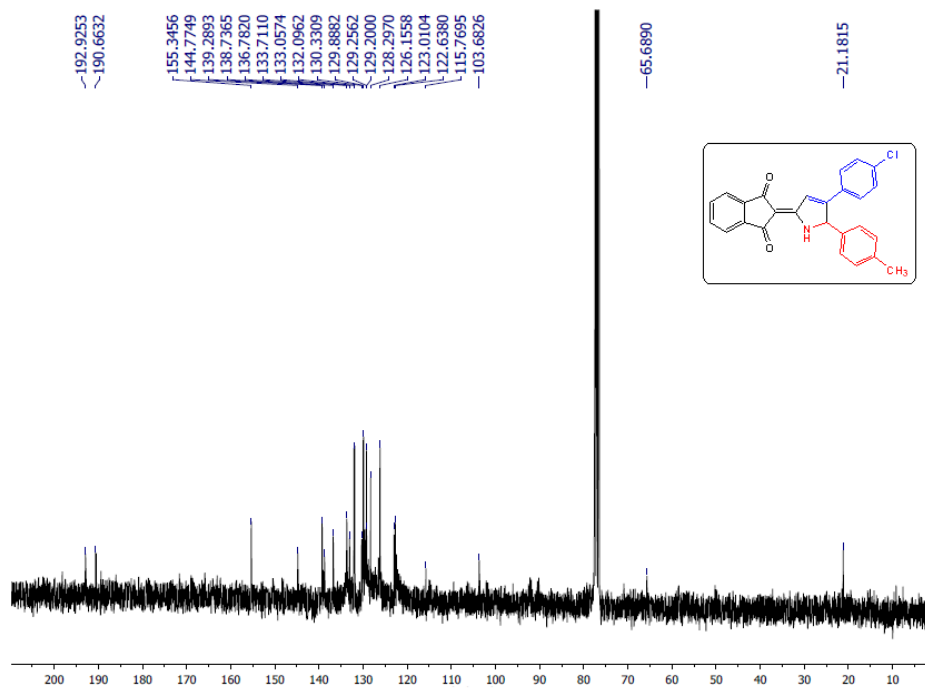

$^{13}\text{C}$  NMR (126 MHz) of compound **10e** in  $\text{CDCl}_3$

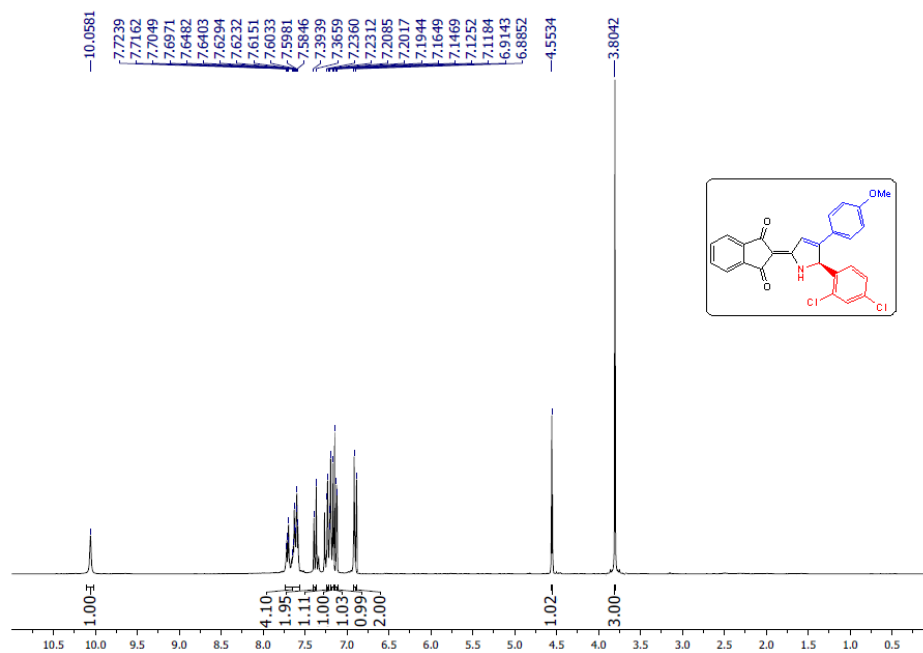

<sup>1</sup>H NMR (300 MHz) of compound **10f** in CDCl<sub>3</sub>

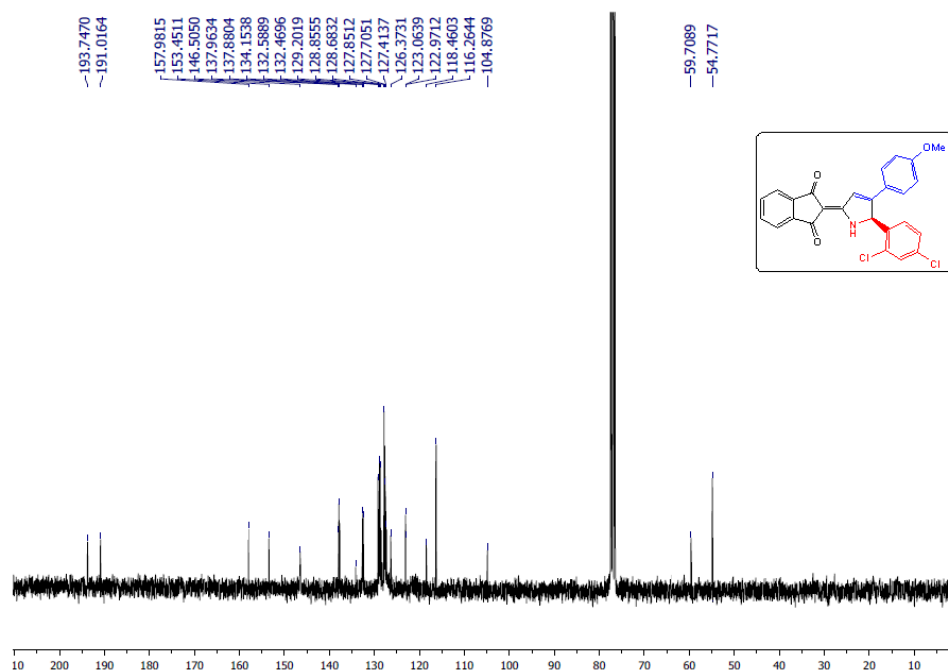

<sup>13</sup>C NMR (75.6 MHz) of compound **10f** in CDCl<sub>3</sub>

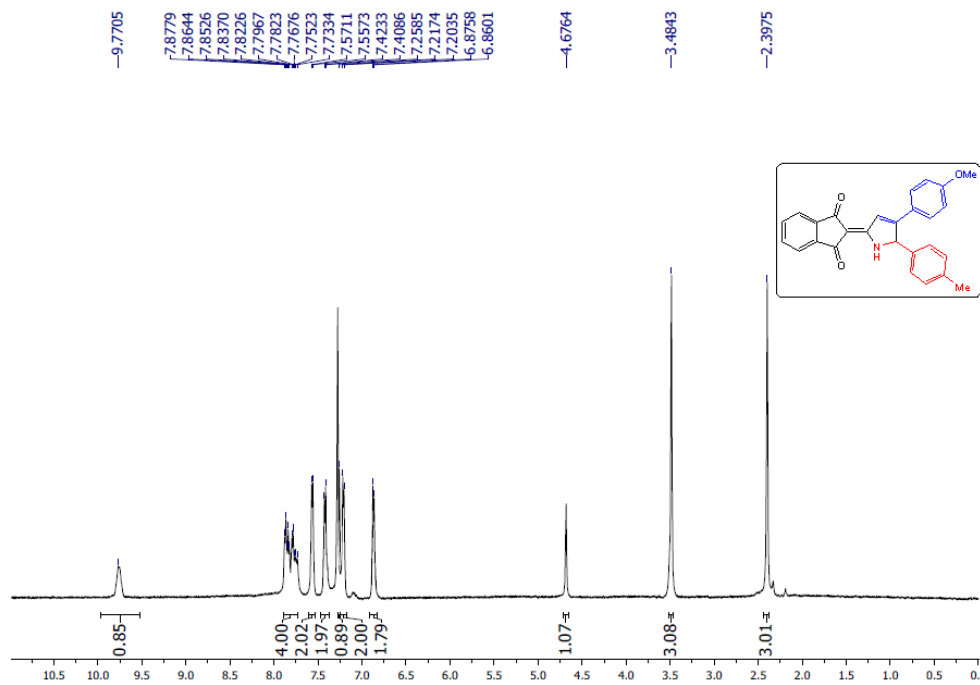

<sup>1</sup>H NMR (500 MHz) of compound **10g** in CDCl<sub>3</sub>

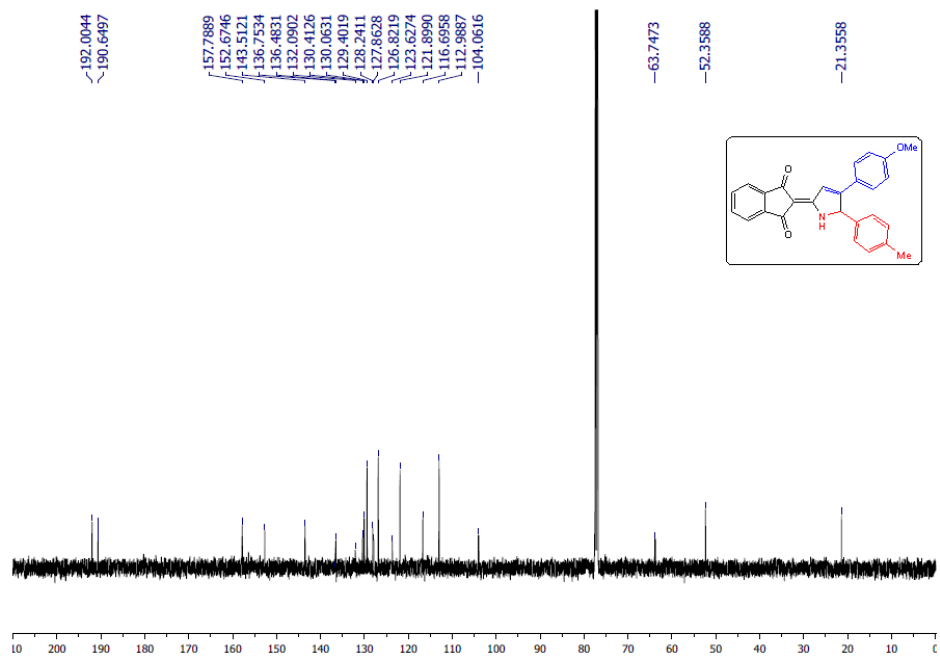

<sup>13</sup>C NMR (126 MHz) of compound **10g** in CDCl<sub>3</sub>



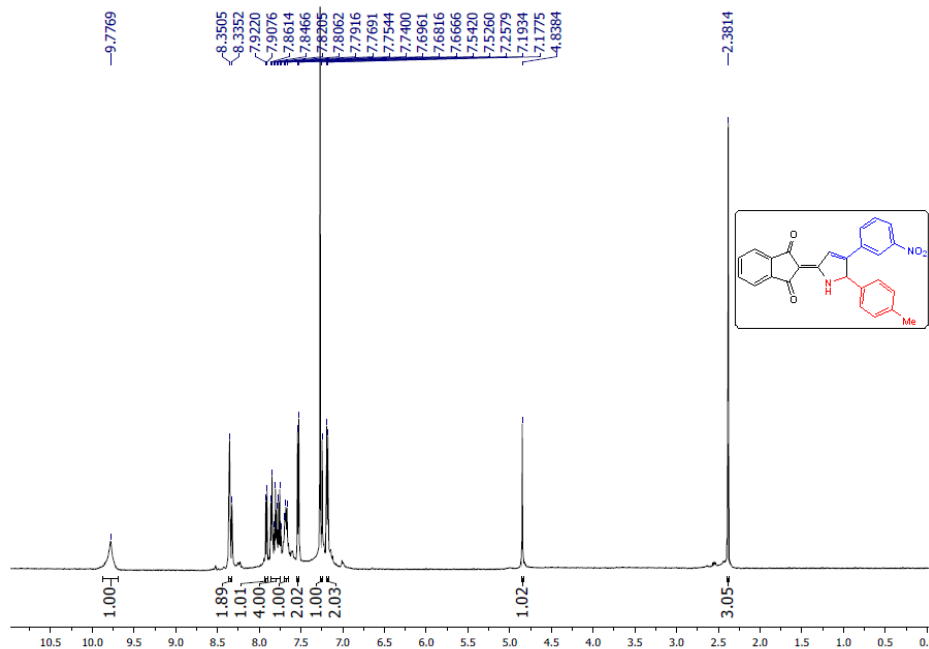

$^1\text{H}$  NMR (500 MHz) of compound **10h** in  $\text{CDCl}_3$

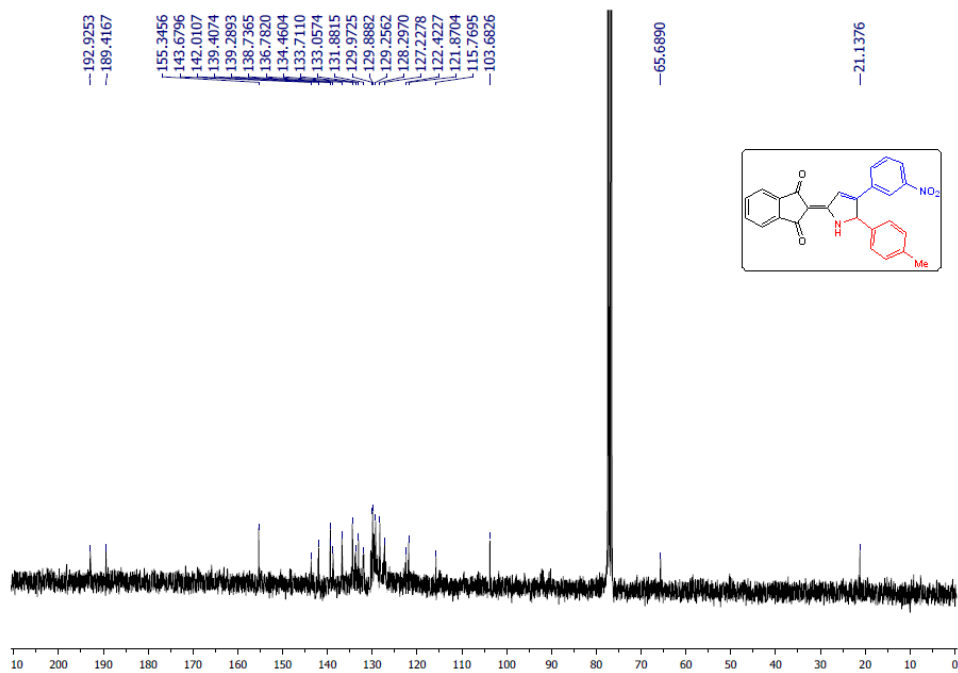

$^{13}\text{C}$  NMR (126 MHz) of compound **10h** in  $\text{CDCl}_3$

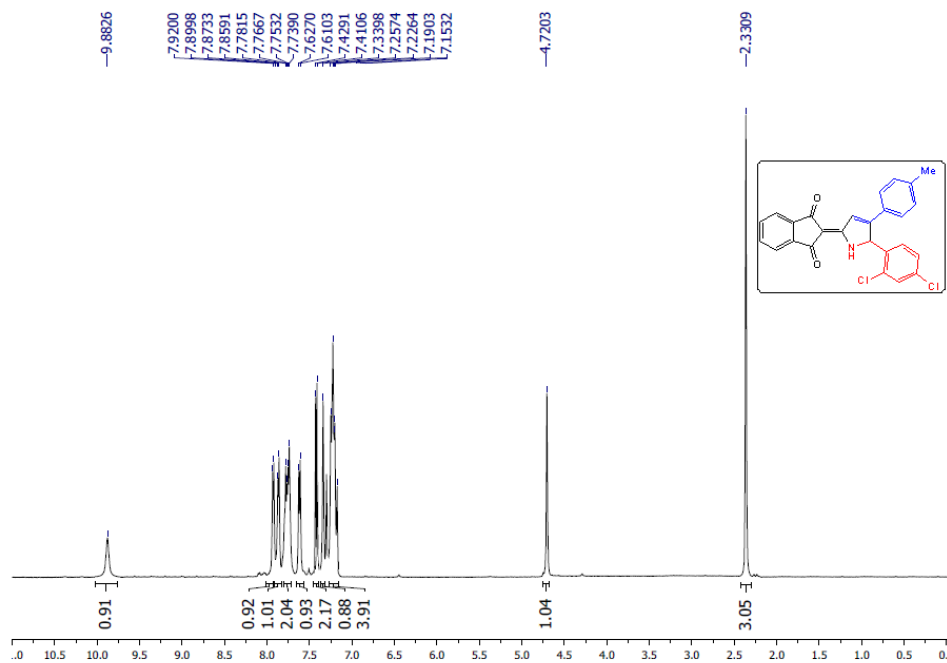

$^1\text{H}$  NMR (500 MHz) of compound **10i** in  $\text{CDCl}_3$

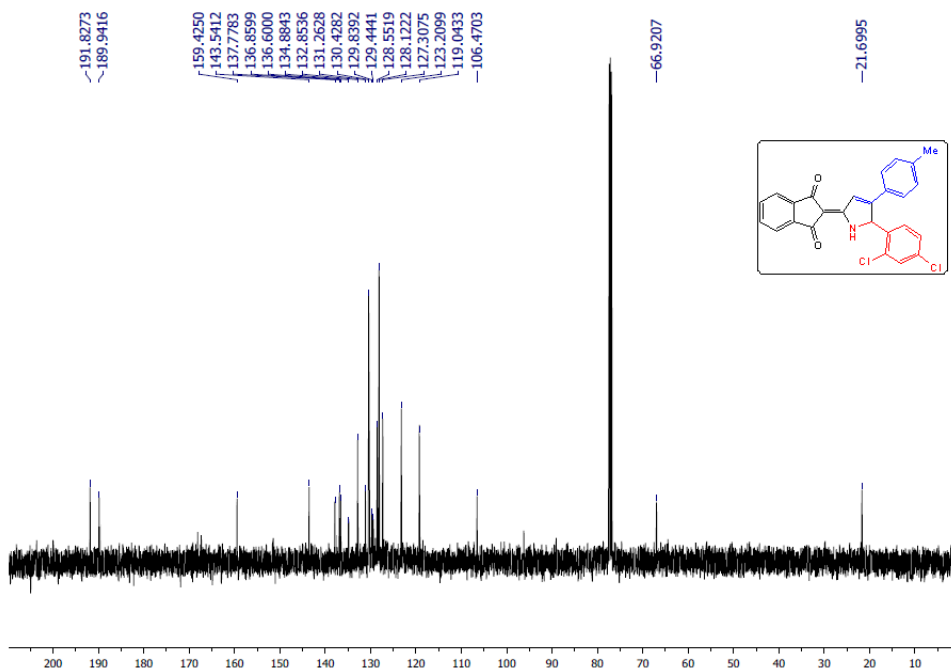

$^{13}\text{C}$  NMR (126 MHz) of compound **10i** in  $\text{CDCl}_3$
